# Supplementary material
Source: publisher figshare collection journal article supplement (https://sage.figshare.com/ndownloader/files/45129695)
Supplement: Supplementary file 1 [file 45129695]

## Sheet: Countries
Country	AppName ID	Date of update	Number of installs	Reviews	Number of reviews	Current version	Updated	Requires Android	Offered by	Permissions
Algeria	Coronavirus Algérie	2020-11-26 23:47:20	100000	2.7	745	1.0.3	2020-03-23	4.1 and up	Algerian Ministry of Startups	This app has access to locations, phone, photos/media/files, storage, and device ID & call information
Australia	COVIDSafe	2020-11-27 00:49:40	1000000	2.8	13731	1.14.0	2020-11-06	5.0 and up	Australian Department of Health	This app has access to: Location: Precise location (GPS and network-based) and approximate location (network-based) Other: Receive data from Internet Access Bluetooth settings Full network access Prevent device from sleeping Pair with Bluetooth devices Run at startup View network connections
Austria	Stopp Corona	2020-11-27 03:00:00	100000	3.1	3297	2.0.5.1081-QA_250	2020-10-09	6.0 and up	Österreichisches Rotes Kreuz	This app has access to: View network connections Pair with Bluetooth devices Full network access Run at startup Prevent device from sleeping
Azerbaijan	e-Tabib	2020-11-27 01:14:00	100000	3.4	2213	1.7.7	2020-09-25	5.0 and up	Data Processing Center	This app has access to: Wi-Fi connection information (view Wi-Fi connections) Location: approximate location (network-based) and precise location (GPS and network-based) Phone (directly call phone numbers) Camera (take pictures and videos) Other: Receive data from Internet Access Bluetooth settings Pair with Bluetooth devices View network connections Full network access Prevent device from sleepi…
Bahrain	BeAware Bahrain	2020-11-26 22:50:06	100000	4.4	4311	0.2.7	2020-11-12	4.4 and up	Information & eGovernment Authority	This app has access to: Device & app history (retrieve running apps) Calendar: Read calendar events plus confidential information Add or modify calendar events and send email to guests without owners' knowledge Location: Approximate location (network-based) and precise location (GPS and network-based) Access extra location provider commands Photos / Media / Files: Read the contents of your USB st…
Bangladesh	Corona Tracer BD	2020-11-26 23:32:36	500000	3.4	4363	1.0.14	2020-07-21	5.0 and up	Mobile game & application project, ICT Division	This app has access to: Location: precise location (GPS and network-based) Phone: read phone status and identity Device ID & call information: read phone status and identity Other: View network connections Pair with Bluetooth devices Access Bluetooth settings Full network access Run at startup Prevent device from sleeping
Belgium	Coronalert	2020-11-26 23:42:30	1000000	3.4	3244	1.9.0	2020-11-17	6.0 and up	Sciensano - Belgium	This app has access to: Other view network connections full network access prevent device from sleeping pair with Bluetooth devices run at startup
Bermuda, UK	WeHealth Bermuda	2020-11-28 00:20:00	500			1.2.3-bm	2020-11-09	6.0 and up	WeHealth Solutions PBC	This app has access to: Other view network connections pair with Bluetooth devices full network access run at startup prevent device from sleeping
Bhutan	Druk Trace	2020-11-27 01:03:00	100000	4.2	1266	2.0	2020-07-21	4.1 and up	G2C Bhutan Apps	Wi-Fi connection information: view Wi-Fi connections Camera: take pictures and videos Storage: Read the contents of your USB storage Modify or delete the contents of your USB storage Device ID & call information: Read phone status and identity Phone: Read phone status and identity Photos / Media / Files: Read the contents of your USB storage Modify or delete the contents of your USB storage Other…
Brazil	Coronavirus SUS	2020-11-26 23:49:20	5000000	3.6	20428	2.1.8	2020-10-27	5.0 and up	Governo do Brasil	This app has access to: Receive data from Internet View network connections Pair with Bluetooth devices Full network access Run at startup Control vibration Prevent device from sleeping
Brazil, Pernambuco	Dycovid - Dynamic Contact Tracing	2020-11-27 01:04:00	100000	3.6	1987	2.7.2	2020-09-17	5.0 and up	MAMBALABS	This app has access to: Device & app history: retrieve running apps Location: Approximate location (network-based) Precise location (GPS and network-based) Access extra location provider commands Wi-Fi connection information: view Wi-Fi connections Other: Receive data from Internet View network connections Pair with Bluetooth devices Access Bluetooth settings Full network access Run at startup Pr…
Brazil, Rio Grande do Norte	Tô de Olho	2020-11-27 03:09:00	10000	3.7	208	2.5	2020-08-19	4.1 and up	Ministerio Púbico do Estado do Rio Grande do Norte	This app has access to: Location approximate location (network-based) precise location (GPS and network-based) access extra location provider commands Photos/Media/Files read the contents of your USB storage modify or delete the contents of your USB storage Storage read the contents of your USB storage modify or delete the contents of your USB storage Camera take pictures and videos Wi-Fi connect…
Brunei Darussalam	BruHealth	2020-11-27 23:11:00	100000	4	1939	2.0.2	2020-10-30	7.0 and up	E-Government National Center	This app has access to: Photos/Media/Files modify or delete the contents of your USB storage read the contents of your USB storage Device ID & call information read phone status and identity Location precise location (GPS and network-based) access extra location provider commands approximate location (network-based) Phone read phone status and identity directly call phone numbers Camera take pict…
Bulgaria	ViruSafe	2020-11-27 03:17:00	10000	3.1	1060	1.0.3	2020-05-27	5.0 and up	government.bg	This app has access to: Location: Precise location (GPS and network-based) Other: Receive data from Internet View network connections Full network access Run at startup Prevent device from sleeping
Canada	COVID Alert	2020-11-26 23:55:30	1000000	3.6	6538	1.1.2	2020-11-23	6.0 and up	Health Canada | Santé Canada	This app has access to: Device & app history: retrieve running apps Wi-Fi connection information: view Wi-Fi connections Other: View network connections Pair with Bluetooth devices Full network access Run at startup Prevent device from sleeping
Canada, Alberta	ABTraceTogether	2020-11-26 22:31:03	100000	1.1	870	1.4.0	2020-09-28	8.0 and up	Government of the Province of Alberta	This app has access to: Location: precise location (GPS and network-based) Wi-Fi connection information: view Wi-Fi connections Other: Access Bluetooth settings Pair with Bluetooth devices Full network access Run at startup
Colombia	CoronApp	2020-11-26 23:45:20	10000000	3.7	67386	1.2.58	2020-11-21	5.1 and up	INS.GOV	This app has access to: Contacts: read your contacts Device ID & call information: read phone status and identity Location: precise location (GPS and network-based) and approximate location (network-based) Phone: Read phone status and identity Directly call phone numbers Other: receive data from Internet set an alarm full network access run at startup view network connections prevent device from …
Croatia	Stop COVID-19	2020-11-27 02:58:00	50000	3.8	497	2.1.0	2020-11-25	6.0 and up	Ministarstvo zdravstva	This app has access to: receive data from Internet pair with Bluetooth devices run at startup view network connections full network access prevent device from sleeping
Cyprus	CovTracer	2020-11-27 00:59:00	1000	4.3	16	2.0.2	2020-06-11	5.0 and up	RISE Research Centre of Excellence	This app has access to: Storage: Read the contents of your USB storage Modify or delete the contents of your USB storage Location: Precise location (GPS and network-based) Access extra location provider commands Approximate location (network-based) Photos / Media / Files: Read the contents of your USB storage Modify or delete the contents of your USB storage Wi-Fi connection information: View Wi-…
Czech Republic	eRouška	2020-11-27 01:29:00	1000000	3.8	6791	2.2.666	2020-11-11	6.0 and up	Ministerstvo zdravotnictví České republiky	This app has access to: Other: receive data from Internet view network connections full network access prevent device from sleeping pair with Bluetooth devices run at startup
Denmark	Smitte|stop	2020-11-27 02:49:00	500000	2.7	1435	2.0.1	2020-11-13	6.0 and up	Sundheds- og Ældreministeriet	This app has access to: Other: view network connections pair with Bluetooth devices full network access run at startup prevent device from sleeping
Ecuador	ASI	2020-11-26 22:41:09	500000	3.3	1421	0.0.12-pilot	2020-08-30	6.0 and up	Ministerio de Telecomunicaciones Ecuador	This app has access to: Other full network access prevent device from sleeping view network connections pair with Bluetooth devices run at startup
Estonia	HOIA	2020-11-27 01:43:00	100000	3.3	548	1.0.6	2020-11-17	6.0 and up	TEHIK	This app has access to: Other: view network connections pair with Bluetooth devices full network access run at startup prevent device from sleeping
Fiji	careFIJI	2020-11-26 23:20:06	50000	3.6	226	1.0.48	2020-11-14	5.1 and up	Government of the Republic of Fiji	Location: precise location (GPS and network-based) Other: receive data from Internet pair with Bluetooth devices run at startup view network connections prevent device from sleeping access Bluetooth settings control vibration full network access
Finland	Koronavilkku	2020-11-27 01:52:00	1000000	3.6	4573	1.3.0+4c5041c	2020-11-23	6.0 and up	Terveyden ja hyvinvoinnin laitos	This app has access to: Pair with Bluetooth devices View network connections Full network access Prevent device from sleeping Run at startup
France	TousAntiCovid (StopCovid France)	2020-11-27 03:11:00	5000000	3.4	27603	2.1.8	2020-11-25	5.0 and up	Gouvernement	This app has access to: Location: Precise location (GPS and network-based) Approximate location (network-based) Camera: take pictures and videos Wi-Fi connection information: view Wi-Fi connections Other: Receive data from Internet Run at startup Full network access Prevent device from sleeping View network connections Access Bluetooth settings Pair with Bluetooth devices
Georgia, Tiblisi	Stop Covid	2020-11-27 02:57:00	100000	3.9	708	1.0.467	2020-04-17	5.0 and up	Ministry of IDPs, Labour, Health, Social Affairs	This app has access to: Wi-Fi connection information: view Wi-Fi connections Location: Precise location (GPS and network-based) Approximate location (network-based) Other: receive data from Internet control Near Field Communication pair with Bluetooth devices view network connections connect and disconnect from Wi-Fi full network access access Bluetooth settings control vibration prevent device f…
Germany	Corona-Warn-App	2020-11-26 23:41:30	10000000	3	96064	1.6.1	2020-11-23	6.0 and up	Robert Koch-Institut	This app has access to: Camera: take pictures and videos Other: run at startup full network access prevent device from sleeping view network connections pair with Bluetooth devices
Germany	Coronika	2020-11-27 13:33:00	50000	4.1	350	1.7.1	2020-11-06	4.4 and up	Kreativzirkel UG (haftungsbeschränkt)	This app has access to: Identity read your own contact card Contacts read your contacts Photos/Media/Files read the contents of your USB storage modify or delete the contents of your USB storage Storage read the contents of your USB storage modify or delete the contents of your USB storage Other receive data from Internet view network connections full network access run at startup control vibrati…
Ghana	GH COVID-19 Tracker	2020-11-27 01:32:00	5000	3.8	30	1.0.5	2020-07-27	5.0 and up	Ministry of Communications	Device & app history: retrieve running apps Location: Approximate location (network-based) Precise location (GPS and network-based) Access extra location provider commands Photos/Media/Files: Read the contents of your USB storage Modify or delete the contents of your USB storage Storage: Read the contents of your USB storage Modify or delete the contents of your USB storage Camera: Take pictures …
Gibraltar	Beat COVID Gibraltar	2020-11-26 22:45:30	10000	3.1	70	1.0.2	2020-11-11	6.0 and up	Gibraltar Health Authority	This app has access to: Wi-Fi connection information: view Wi-Fi connections Other: View network connections Pair with Bluetooth devices Full network access
Guam	Guam Covid Alert	2020-11-27 13:19:00	5000	4.3	42	1.0.10	2020-11-17	6.0 and up	Otech Developer	This app has access to: Wi-Fi connection information view Wi-Fi connections Other view network connections pair with Bluetooth devices full network access run at startup control vibration prevent device from sleeping
Haiti	PathCheck SafePlaces (formerly COVID Safe Paths)	2020-11-27 02:14:00	10000	4.1	74	1.3.1 (2)	2020-08-05	5.0 and up	Path Check, Inc
Hashemite Kingdom of Jordan	AMAN	2020-11-26 22:37:33	1000000	3.2	6602	1.0	2020-05-24	5.0 and up	Jordan eGov Program	This app has access to: Wi-Fi connection information: view Wi-Fi connections Location: approximate location (network-based) precise location (GPS and network-based) access extra location provider commands Device & app history: retrieve running apps Photos / Media / Files: modify or delete the contents of your USB storage read the contents of your USB storage Storage: modify or delete the contents…
Hungary	VírusRadar	2020-11-27 03:18:10	100000	3.1	435	1.0.0	2020-05-15	5.0 and up	Kormányzati Informatikai Fejlesztési Ügynökség	This app has access to: Location: Approximate location (network-based) Precise location (GPS and network-based) Other: receive data from Internet view network connections pair with Bluetooth devices access Bluetooth settings full network access run at startup prevent device from sleeping
Iceland	Rakning C-19	2020-11-27 02:39:00	100000	3	379	2.1.2	2020-07-19	5.0 and up	Embætti landlæknis	This app has access to: Phone: read phone status and identity Device ID & call information: read phone status and identity Photos / Media / Files: Read the contents of your USB storage Modify or delete the contents of your USB storage Location: Approximate location (network-based) Precise location (GPS and network-based) Access extra location provider commands Storage: Read the contents of your U…
India	Aarogya Setu	2020-11-26 22:29:06	100000000	4.1	1422401	1.4.1	2020-07-08	5.0 and up	NIC eGov Mobile Apps	This app has access to: Location: approximate location (network-based) precise location (GPS and network-based) Camera: take pictures and videos Other: receive data from Internet view network connections pair with Bluetooth devices access Bluetooth settings full network access run at startup prevent device from sleeping
India, Karnataka	Corona Watch	2020-11-26 23:38:30	500000	2.4	2115	1.07	2020-06-29	4.2 and up	KSRSAC KGIS	This app has access to: Location: approximate location (network-based) precise location (GPS and network-based) Phone: read phone status and identity Photos/Media/Files: read the contents of your USB storage modify or delete the contents of your USB storage Storage: read the contents of your USB storage modify or delete the contents of your USB storage Wi-Fi connection information: view Wi-Fi con…
India, Maharashtra	Mahakavach	2020-11-27 01:55:00	100000	2.6	222	1.7.1	2020-05-08	4.3 and up	Maharashtra State Innovation Society	This app has access to: Identity: find accounts on the device add or remove accounts Contacts: find accounts on the device read your contacts Location: approximate location (network-based) precise location (GPS and network-based) Phone: directly call phone numbers Photos / Media / Files: read the contents of your USB storage modify or delete the contents of your USB storage Storage: read the cont…
India, Punjab	COVA Punjab	2020-11-26 23:53:20	1000000	3.9	32223	1.3.23	2020-10-28	4.4 and up	Government of Punjab	This app has access to: Location: approximate location (network-based) precise location (GPS and network-based) Photos/Media/Files: read the contents of your USB storage modify or delete the contents of your USB storage Storage: read the contents of your USB storage modify or delete the contents of your USB storage Camera: take pictures and videos Other: receive data from Internet view network co…
India, Surat Municipality	SMC COVID-19 Tracker	2020-11-27 02:47:00	100000	3.1	347	1.2.6	2020-09-02	4.1 and up	Surat Municipal Corporation (SMC)	This app has access to: Identity: find accounts on the device Contacts: find accounts on the device Location: approximate location (network-based) precise location (GPS and network-based) Phone: read phone status and identity Photos / Media / Files: read the contents of your USB storage modify or delete the contents of your USB storage Storage: read the contents of your USB storage modify or dele…
Indonesia	PeduliLindungi	2020-11-27 02:19:00	1000000	3.9	38936	2.3.0	2020-07-21	5.0 and up	Kementerian Kominfo	This app has access to: Location: precise location (GPS and network-based) approximate location (network-based) Wi-Fi connection information: view Wi-Fi connections Camera: take pictures and videos Storage: read the contents of your USB storage modify or delete the contents of your USB storage Photos/Media/Files: read the contents of your USB storage modify or delete the contents of your USB stor…
Ireland	COVID Tracker Ireland	2020-11-27 00:22:30	500000	3.8	3507	1.0.4	2020-10-27	6.0 and up	Health Service Executive (HSE)	This app has access to: Wi-Fi connection information: view Wi-Fi connections Other: view network connections full network access pair with Bluetooth devices run at startup
Israel	HaMagen	2020-11-27 01:36:00	1000000	3.2	5063	2.2.14	2020-08-27	5.0 and up	משרד הבריאות Gov	This app has access to: Device & app history: retrieve running apps Location: approximate location (network-based) precise location (GPS and network-based) access extra location provider commands Wi-Fi connection information: view Wi-Fi connections Other: receive data from Internet view network connections pair with Bluetooth devices access Bluetooth settings full network access run at startup dr…
Italy	Immuni	2020-11-27 01:45:00	5000000	2.6	41884	2.1.1	2020-11-03	6.0 and up	Ministero della Salute	This app has access to: Other: pair with Bluetooth devices view network connections full network access prevent device from sleeping run at startup
Italy	SM-Covid19	2020-11-27 02:46:00	50000	4	846	5.1	2020-07-17	5.0 and up	Softmining Srl	This app has access to: Location: precise location (GPS and network-based) approximate location (network-based) Phone: read phone status and identity Device ID & call information: read phone status and identity Storage: modify or delete the contents of your USB storage read the contents of your USB storage Wi-Fi connection information: view Wi-Fi connections Photos / Media / Files: modify or dele…
Japan	COCOA COVID-19 Contact-Confirming Application	2020-11-26 23:25:06	5000000	3.3	11803	1.1.5	2020-10-30	6.0 and up	厚生労働省健康局	This app has access to: Other: view network connections full network access prevent device from sleeping pair with Bluetooth devices run at startup
Kazakhstan	Saqbol	2020-11-27 23:41:00	50000	2.7	282	1.0.8	2020-10-21	6.0 and up	NITEC.KZ	This app has access to: Other view network connections full network access prevent device from sleeping pair with Bluetooth devices run at startup
Kenya	Kenya Covid-19 Tracker	2020-11-27 01:49:00	1000	2.3	20	v0.4.38	2020-04-28	4.4 and up	Medic Mobile, Inc.	This app has access to: Location: approximate location (network-based) precise location (GPS and network-based) Photos / Media / Files: modify or delete the contents of your USB storage read the contents of your USB storage Storage: modify or delete the contents of your USB storage read the contents of your USB storage Other: install shortcuts control vibration view network connections full netwo…
Kuwait	Shlonik	2020-11-27 02:44:00	100000	3.8	1221	Varies with device	2020-11-11	4.4 and up	Kuwait Central Agency for Information Technology	This app has access to: Device & app history: retrieve running apps Storage: read the contents of your USB storage modify or delete the contents of your USB storage Camera: take pictures and videos Location: approximate location (network-based) precise location (GPS and network-based) access extra location provider commands Microphone: record audio Device ID & call information: read phone status …
La Réunion, France	Alertanoo	2020-11-26 22:33:22	1000			1.0.1	2020-10-23	5.0 and up	Alertanoo	This app has access to: Wi-Fi connection information view Wi-Fi connections Other receive data from Internet full network access view network connections prevent device from sleeping change network connectivity run at startup pair with Bluetooth devices access Bluetooth settings"
Latvia	Apturi Covid Latvia	2020-11-26 22:39:12	100000	3.7	1065	1.1	2020-10-27	6.0 and up	SPKC	This app has access to: Other: receive data from Internet pair with Bluetooth devices view network connections full network access prevent device from sleeping run at startup
Lebanon	MOPH Ma3an	2020-11-27 01:54:00	10000	3.5	118	1.0.5	2020-10-30	5.0 and up	Lebanese Ministry of Public Health	This app has access to: Location: precise location (GPS and network-based) Photos / Media / Files: read the contents of your USB storage modify or delete the contents of your USB storage Storage: read the contents of your USB storage modify or delete the contents of your USB storage Other: receive data from Internet view network connections pair with Bluetooth devices access Bluetooth settings fu…
Lithuania	Korona Stop LT	2020-11-27 23:58:00	50000	3.6	266	1.0.0	2020-11-06	6.0 and up	National Public Health Center under the Ministry of Health - Nacionalinis visuomenes sveikatos centras	This app has access to: Camera take pictures and videos Other view network connections full network access prevent device from sleeping pair with Bluetooth devices run at startup
Malaysia	Gerak Malaysia	2020-11-27 01:30:00	1000000	3.6	7412	2.6.73	2020-05-22	5.0 and up	MALAYSIAN COMMUNICATIONS AND MULTIMEDIA COMMISSION	This app has access to: Phone: read phone status and identity Device ID & call information: read phone status and identity Wi-Fi connection information: view Wi-Fi connections Camera: take pictures and videos Photos / Media / Files: read the contents of your USB storage modify or delete the contents of your USB storage Location: approximate location (network-based) precise location (GPS and netwo…
Malaysia	MyTrace	2020-11-27 01:59:00	100000	4	953	1.0.30	2020-04-26	6.0 and up	GOVERNMENT OF MALAYSIA	This app has access to: Device & app history: retrieve running apps Location: approximate location (network-based) precise location (GPS and network-based) Photos / Media / Files: read the contents of your USB storage modify or delete the contents of your USB storage Storage: read the contents of your USB storage modify or delete the contents of your USB storage Other: receive data from Internet …
Malaysia, Sarawak	COVIDTrace Sarawak	2020-11-27 00:53:40	50000	3.2	143	2.1.0	2020-09-17	5.1 and up	Sarawak Government	This app has access to: Location: approximate location (network-based) precise location (GPS and network-based) Camera: take pictures and videos Other: receive data from Internet view network connections pair with Bluetooth devices access Bluetooth settings full network access run at startup control vibration prevent device from sleeping
Maldives	TraceEkee	2020-11-27 03:13:00	10000	4.4	112	1.0.2	2020-04-28	5.1 and up	HPA Maldives	This app has access to: Location: precise location (GPS and network-based) Other: receive data from Internet view network connections pair with Bluetooth devices access Bluetooth settings full network access run at startup prevent device from sleeping
Malta	COVIDAlert Malta	2020-11-27 00:43:40	50000	4.5	136	1.2.8	2020-09-03	6.0 and up	Government of Malta	This app has access to: Other: view network connections pair with Bluetooth devices full network access run at startup prevent device from sleeping
Mexico	COVID-19MX	2020-11-27 00:38:40	500000	3.6	3314	Varies with device	2020-11-10	6.0 and up	Secretaría de Salud MX	This app has access to: Camera: take pictures and videos Contacts: read your contacts Photos / Media / Files: read the contents of your USB storage modify or delete the contents of your USB storage Storage: read the contents of your USB storage modify or delete the contents of your USB storage Location: precise location (GPS and network-based) approximate location (network-based) Other: receive d…
Mexico, Jalisco	Plan Jalisco Covid-19	2020-11-27 02:21:00	5000	2.7	34	1.6	2020-04-29	5.0 and up	Gobierno del Estado de Jalisco	This app has access to: Location: approximate location (network-based) Other: receive data from Internet view network connections full network access prevent device from sleeping
Mexico, Nuevo Leon	CovidRadar.mx	2020-11-27 00:19:30	50000	2.6	126	2.0.0	2020-10-31	5.0 and up	LUMC Leiden	This app has access to: Phone: read phone status and identity Photos/Media/Files: read the contents of your USB storage modify or delete the contents of your USB storage Storage: read the contents of your USB storage modify or delete the contents of your USB storage Device ID & call information: read phone status and identity Other: receive data from Internet view network connections full network…
Morocco	Wiqaytna	2020-11-27 03:18:00	1000000	4.2	13112	1.2.1	2020-08-12	5.0 and up	Ministère de l'Intérieur du Maroc	This app has access to: Location: precise location (GPS and network-based) Other: receive data from Internet access Bluetooth settings run at startup full network access prevent device from sleeping view network connections pair with Bluetooth devices
Nepal	Nepal Trace	2020-11-09 17:54:23	500	3	7	3.0.3	2020-05-24	5.0 and up	Pradesh 5	This app has access to: Location: approximate location (network-based) precise location (GPS and network-based) Wi-Fi connection information: view Wi-Fi connections Other: view network connections pair with Bluetooth devices access Bluetooth settings full network access run at startup prevent device from sleeping
Nepal, Barghadat	Bardghat Municipality - COVID-19/Disaster Response	2020-11-26 22:42:06	500	5	1	0.0.5	2020-04-27	4.4 and up	SmartPalika - स्मार्ट बन्दैछ नेपाल!	This app has access to: Location approximate location (network-based) precise location (GPS and network-based) access extra location provider commands Phone directly call phone numbers Photos/Media/Files read the contents of your USB storage modify or delete the contents of your USB storage Storage read the contents of your USB storage modify or delete the contents of your USB storage Other recei…
Netherlands	CoronaMelder	2020-11-26 23:44:10	1000000	3	6132	1.0.5	2020-11-09	6.0 and up	Rijksoverheid	This app has access to: Other: view network connections pair with Bluetooth devices full network access run at startup prevent device from sleeping
New Zealand	NZ COVID Tracer	2020-11-27 02:11:00	1000000	2.8	4436	2.0.0	2020-11-20	6.0 and up	Ministry of Health NZ	This app has access to: Camera: take pictures and videos Other: receive data from Internet view network connections full network access control vibration prevent device from sleeping
North Macedonia	StopKorona!	2020-11-27 02:59:00	50000	3.3	310	1.1.0	2020-05-07	5.0 and up	Ministry of Information Society and Administration	This app has access to: Location: approximate location (network-based) precise location (GPS and network-based) Other: receive data from Internet view network connections pair with Bluetooth devices access Bluetooth settings full network access prevent device from sleeping
Norway	Smittestopp	2020-11-27 02:51:00	100000	2.2	2150	1.3.0	2020-06-08	5.0 and up	Folkehelseinstituttet	This app has access to: Location: precise location (GPS and network-based) Other: access Bluetooth settings pair with Bluetooth devices view network connections full network access prevent device from sleeping run at startup
Oman	HMushrif	2020-11-27 01:41:00	10000	2.4	111	1.1.4	2020-09-26	7.0 and up	Ministry of Health Apps	This app has access to: Location: approximate location (network-based) precise location (GPS and network-based) access extra location provider commands Phone: read phone status and identity Photos / Media / Files: read the contents of your USB storage modify or delete the contents of your USB storage Storage: read the contents of your USB storage modify or delete the contents of your USB storage …
Oman	Tarassud+	2020-11-29 20:52:00	100000	3	1346	4.0	2020-11-18	5.0 and up	Ministry of Health Apps	This app has access to: Photos/Media/Files modify or delete the contents of your USB storage read the contents of your USB storage Location precise location (GPS and network-based) approximate location (network-based) Camera take pictures and videos Storage modify or delete the contents of your USB storage read the contents of your USB storage Other receive data from Internet full network access …
Philippines	RC143	2020-11-27 02:40:00	100000	3.5	750	1.6.13	2020-08-22	5.1 and up	Philippine Red Cross	This app has access to: Location: precise location (GPS and network-based) approximate location (network-based) Other: receive data from Internet access Bluetooth settings pair with Bluetooth devices view network connections full network access prevent device from sleeping run at startup
Philippines	StaySafe PH	2020-11-27 02:56:00	100000	4	2378	1.3.1	2020-09-28	5.0 and up	Multisys Technologies Corporation	This app has access to: Location: approximate location (network-based) precise location (GPS and network-based) Phone: read phone status and identity Photos / Media / Files: read the contents of your USB storage modify or delete the contents of your USB storage Storage: read the contents of your USB storage modify or delete the contents of your USB storage Camera: take pictures and videos Wi-Fi c…
Poland	STOP COVID - ProteGO Safe	2020-11-27 02:34:00	1000000	2.4	4697	4.8.0	2020-11-24	5.0 and up	Ministerstwo Cyfryzacji	This app has access to: Other: receive data from Internet pair with Bluetooth devices run at startup view network connections full network access prevent device from sleeping
Portugal	StayAway COVID	2020-11-27 02:52:00	1000000	3.2	7390	1.0.6	2020-11-04	6.0 and up	FCT FCCN	This app has access to: Other: view network connections pair with Bluetooth devices full network access run at startup prevent device from sleeping
Puerto Rico, USA	Rastrea el Virus	2020-11-28 00:30:00	50			Varies with device	2020-10-05	Varies with device	Puerto Rico Science, Technology & Research Trust	This app has access to: Wi-Fi connection information view Wi-Fi connections Other view network connections full network access prevent device from sleeping pair with Bluetooth devices control vibration run at startup
Puerto Rico, USA	PathCheck SafePlaces (formerly COVID Safe Paths)	2020-11-27 02:14:00	10000	4.1	74	1.3.1 (2)	2020-08-05	5.0 and up	Path Check, Inc
Qatar	Ehteraz	2020-11-27 01:25:00	1000000	4	28878	9.0.2	2020-08-10	6.0 and up	Ministry Of Interior - Qatar	This app has access to: Location: approximate location (network-based) precise location (GPS and network-based) Phone: directly call phone numbers read phone status and identity Photos / Media / Files: read the contents of your USB storage modify or delete the contents of your USB storage Storage: read the contents of your USB storage modify or delete the contents of your USB storage Device ID & …
Russia	Госуслуги.COVID трекер	2020-11-27 11:42:00	10000	3.2	183	1.0.1	2020-11-19	6.0 and up	Ministry of digitization of Russia	This app has access to: Other receive data from Internet view network connections pair with Bluetooth devices full network access run at startup control vibration prevent device from sleeping
Saudi Arabia	Tabaud (COVID-19 KSA)	2020-11-27 03:08:00	1000000	4.4	7144	1.2.0	2020-08-28	6.0 and up	National Information Center	This app has access to: Other: receive data from Internet view network connections pair with Bluetooth devices full network access run at startup prevent device from sleeping
Singapore	SwiftMED	2020-11-27 03:05:00	10000	3.3	94	2.2.4.1728	2020-06-03	5.1 and up	SWIFT Office	This app has access to: Calendar: read calendar events plus confidential information add or modify calendar events and send email to guests without owners' knowledge Location: approximate location (network-based) precise location (GPS and network-based) Camera: take pictures and videos Microphone: record audio Wi-Fi connection information: view Wi-Fi connections Other: receive data from Internet …
Singapore	TraceTogether	2020-11-27 03:16:00	1000000	3.7	11213	2.4.2	2020-11-12	5.1 and up	Government Technology Agency	This app has access to: Camera: take pictures and videos Location: precise location (GPS and network-based) approximate location (network-based) Storage: read the contents of your USB storage modify or delete the contents of your USB storage Photos / Media / Files: read the contents of your USB storage modify or delete the contents of your USB storage Other: receive data from Internet pair with B…
Singapore	SafeEntry - TraceTogether	2020-11-27 02:41:00	100000	3.8	185	0.11.0	2020-06-16	5.0 and up	Government Technology Agency	This app has access to: Calendar: read calendar events plus confidential information add or modify calendar events and send email to guests without owners' knowledge Contacts: read your contacts Location: approximate location (network-based) precise location (GPS and network-based) Phone: read phone status and identity Photos / Media / Files: read the contents of your USB storage modify or delete…
Slovenia	#OstaniZdrav	2020-11-28 00:07:00	100000	3.1	990	1.3.1	2020-10-07	6.0 and up	NIJZ	This app has access to: Other view network connections pair with Bluetooth devices full network access run at startup prevent device from sleeping
South Africa	COVI-ID	2020-11-26 23:55:20	500	3.2	5	1.0	2020-06-05	5.0 and up	CSIR	This app has access to: Location: precise location (GPS and network-based) approximate location (network-based) Storage: modify or delete the contents of your USB storage read the contents of your USB storage Camera: take pictures and videos Photos / Media / Files: modify or delete the contents of your USB storage read the contents of your USB storage Other: receive data from Internet full networ…
South Africa	COVID Alert South Africa	2020-11-26 23:58:30	500000	4	1255	1.4.0-gms	2020-10-19	5.0 and up	Department of Health - South Africa	This app has access to: Other view network connections pair with Bluetooth devices full network access run at startup prevent device from sleeping
Spain	Radar Covid	2020-11-27 02:36:00	1000000	3.4	12448	1.1.0	2020-10-29	6.0 and up	Ministerio de Asuntos Económicos y Transf. Digital	This app has access to: Other: view network connections pair with Bluetooth devices full network access run at startup prevent device from sleeping
Spain, Basque Country	COVID-19.eus	2020-11-27 00:30:40	100000	3.3	670	4.1	2020-09-04	5.0 and up	Osakidetza	This app has access to: Contacts: read your contacts Photos / Media / Files: read the contents of your USB storage modify or delete the contents of your USB storage Storage: read the contents of your USB storage modify or delete the contents of your USB storage Camera: take pictures and videos Other: receive data from Internet view network connections full network access run at startup prevent de…
Switzerland	SwissCovid	2020-11-27 03:07:00	500000	3.1	3667	1.2.0	2020-10-28	6.0 and up	Federal Office of Public Health FOPH	This app has access to: Other: view network connections pair with Bluetooth devices full network access run at startup prevent device from sleeping
Switzerland	geoHealthApp Covid19 Tracker	2020-11-27 01:29:00	1000	3.3	31	0.0.52	2020-10-02	5.0 and up	Health Tech Cluster Switzerland	This app has access to: Camera: take pictures and videos Microphone: record audio Location: precise location (GPS and network-based) approximate location (network-based) Storage: read the contents of your USB storage modify or delete the contents of your USB storage Calendar: add or modify calendar events and send email to guests without owners' knowledge read calendar events plus confidential in…
Teton County, WY	PathCheck SafePlaces (formerly COVID Safe Paths)	2020-11-27 02:14:00	10000	4.1	74	1.3.1 (2)	2020-08-05	5.0 and up	Path Check, Inc	Path Check, Inc
Thailand	MorChana	2020-11-27 01:56:00	100000	4.1	887	1.8.4	2020-06-06	5.0 and up	Digital Government Development Agency, Thailand	This app has access to: Device & app history: retrieve running apps Location: approximate location (network-based) precise location (GPS and network-based) access extra location provider commands Photos/Media/Files: read the contents of your USB storage modify or delete the contents of your USB storage Storage: read the contents of your USB storage modify or delete the contents of your USB storag…
Togo	TOGO SAFE	2020-11-27 03:10:00	10000	3.9	32	1.0	2020-07-22	5.0 and up	MPENIT Togo	This app has access to: Location approximate location (network-based) precise location (GPS and network-based) Camera take pictures and videos Wi-Fi connection information view Wi-Fi connections Other receive data from Internet view network connections pair with Bluetooth devices access Bluetooth settings full network access run at startup prevent device from sleeping
Tunisia	E7mi	2020-11-27 01:22:00	50000	3.8	273	1.1	2020-05-22	5.0 and up	ONMNE Tunisie	This app has access to: Location: precise location (GPS and network-based) Other: receive data from Internet pair with Bluetooth devices access Bluetooth settings full network access run at startup
Turkey	Hayat Eve Sığar	2020-11-27 01:37:00	10000000	3.1	100762	2.2.2	2020-11-15	5.0 and up	T.C. Sağlık Bakanlığı	This app has access to: Contacts: read your contacts Location: approximate location (network-based) precise location (GPS and network-based) Photos/Media/Files: read the contents of your USB storage modify or delete the contents of your USB storage Storage: read the contents of your USB storage modify or delete the contents of your USB storage Camera: take pictures and videos Microphone: record a…
UAE, Abu Dhabi	TraceCovid	2020-09-25 13:25:15	100000	3	340	1.1.6	2020-04-13	5.1 and up	Department of Health - Abu Dhabi	This app has access to: Location: approximate location (network-based) precise location (GPS and network-based) Photos/Media/Files: read the contents of your USB storage Storage: read the contents of your USB storage Other: receive data from Internet view network connections pair with Bluetooth devices access Bluetooth settings full network access run at startup prevent device from sleeping
UAE, Dubai	ALHOSN	2020-11-26 22:34:01	1000000	4.3	6230	1.44.248	2020-11-10	5.0 and up	MOHAP-UAE	This app has access to: Location: approximate location (network-based) precise location (GPS and network-based) Photos / Media / Files: read the contents of your USB storage modify or delete the contents of your USB storage Storage: read the contents of your USB storage modify or delete the contents of your USB storage Camera: take pictures and videos Other: receive data from Internet view networ…
United Kingdom	Protego	2020-11-27 02:33:00	1000			Varies with device	2020-05-30	Varies with device	Protego App Ltd	This app has access to: Location precise location (GPS and network-based) approximate location (network-based) Other receive data from Internet view network connections run at startup pair with Bluetooth devices access Bluetooth settings full network access prevent device from sleeping
United Kingdom	NHS COVID-19 App	2020-11-27 11:33:00	5000000	4	90403	3.10 (100)	2020-11-05	6.0 and up	NHS	This app has access to: Camera take pictures and videos Other view network connections pair with Bluetooth devices full network access run at startup prevent device from sleeping
Jersey, UK	Jersey COVID Alert	2020-11-27 01:47:00	10000	3	31	1.0.4	2020-11-24	6.0 and up	Government of Jersey	This app has access to: Wi-Fi connection information view Wi-Fi connections Other view network connections pair with Bluetooth devices full network access run at startup control vibration
Isle of Wight, UK	NHS COVID-19 App (pilot)	2020-08-16 22:56:33	50000			Varies with device	2020-06-23	Varies with device	NHS	"This app has access to: Location approximate location (network-based) precise location (GPS and network-based) Other receive data from Internet view network connections full network access prevent device from sleeping run at startup access Bluetooth settings pair with Bluetooth devices"
Northern Ireland, UK	StopCOVID NI	2020-11-27 02:58:30	100000	2.8	488	2.3.0	2020-11-13	6.0 and up	Health & Social Care Northern Ireland	This app has access to: Wi-Fi connection information: view Wi-Fi connections Other: run at startup full network access view network connections pair with Bluetooth devices control vibration
Scotland, UK	Protect Scotland	2020-11-27 02:32:00	500000	3.6	2083	1.0.4	2020-10-08	6.0 and up	NHS Education for Scotland	This app has access to: Wi-Fi connection information view Wi-Fi connections Other view network connections full network access pair with Bluetooth devices control vibration run at startup
Uruguay	Coronavirus UY	2020-11-26 23:51:20	500000	4	4061	4.5.3	2020-10-15	5.0 and up	AGESIC	This app has access to: Microphone: record audio Camera: take pictures and videos Other: receive data from Internet pair with Bluetooth devices view network connections full network access change network connectivity control vibration prevent device from sleeping run at startup
USA, Alabama	GuideSafe	2020-11-27 01:34:00	50000	3.5	179	v1.3	2020-09-11	7.0 and up	Alabama Department of Public Health	This app has access to: Other: view network connections pair with Bluetooth devices full network access run at startup prevent device from sleeping
USA, Allegheny County, PA	NOVID	2020-11-27 02:09:00	10000	4.3	197	4.1.2	2020-11-18	6.0 and up	Expii, Inc.	This app has access to: Location: precise location (GPS and network-based) approximate location (network-based) Wi-Fi connection information: view Wi-Fi connections Microphone: record audio Other: receive data from Internet access Bluetooth settings prevent device from sleeping connect and disconnect from Wi-Fi pair with Bluetooth devices run at startup full network access change your audio setti…
USA, Arizona	Covid Watch Arizona	2020-11-27 00:23:40	5000	4	32	1.2.6-az	2020-11-09	6.0 and up	ADHS-Arizona Department of Health Services	This app has access to: Other: pair with Bluetooth devices view network connections run at startup full network access prevent device from sleeping
USA, California	California COVID Notify	2020-11-27 15:48:00	10000			Varies with device	2020-11-10	Varies with device	CA Dept of Technology	This app has access to: Other view network connections full network access prevent device from sleeping pair with Bluetooth devices run at startup
USA, Colorado	CO Exposure Notifications	2020-11-27 16:00:00	100000	3.5	398	minted11011	2020-10-23	5.0 and up	Colorado Department of Public Health & Environment	This app has access to: Other view network connections full network access prevent device from sleeping pair with Bluetooth devices run at startup
USA, Connecticut	COVID Alert CT	2020-11-27 14:03:00	10000	4.1	92	minted11017	2020-11-09	5.0 and up	CT Department of Public Health	This app has access to: Other pair with Bluetooth devices run at startup view network connections full network access prevent device from sleeping
USA, Delaware	COVID Alert DE	2020-11-27 14:10:00	10000	4.2	69	1.0.1	2020-10-01	6.0 and up	Delaware Department of Health and Social Services	This app has access to: Wi-Fi connection information view Wi-Fi connections Other view network connections pair with Bluetooth devices full network access run at startup
USA, District of Columbia	DC CAN	2020-11-27 16:11:00	10000	4.2	57	minted11018	2020-11-09	5.0 and up	DC Exposure Notifications	This app has access to: Other pair with Bluetooth devices view network connections run at startup full network access prevent device from sleeping
USA, Florida	Healthy Together - COVID-19	2020-11-27 01:40:00	50000	3.6	521	1.4.0	2020-11-19	7.0 and up	Twenty Inc.	This app has access to: Contacts: read your contacts Camera: take pictures and videos Location: precise location (GPS and network-based) Wi-Fi connection information: view Wi-Fi connections Other: receive data from Internet access Bluetooth settings prevent device from sleeping pair with Bluetooth devices run at startup full network access view network connections control vibration
Guam, USA	PathCheck SafePlaces (formerly COVID Safe Paths)	2020-11-27 02:14:00	10000	4.1	74	1.3.1 (2)	2020-08-05	5.0 and up	Path Check, Inc	This app has access to: Storage: modify or delete the contents of your USB storage read the contents of your USB storage Photos/Media/Files: modify or delete the contents of your USB storage read the contents of your USB storage Wi-Fi connection information: view Wi-Fi connections Device & app history: retrieve running apps Location: precise location (GPS and network-based) access extra location …
USA, Hawaii	AlohaSafe Alert	2020-11-27 16:36:00	500	2.5	2	1.0.7	2020-11-12	6.0 and up	Hawaii Department of Health	This app has access to: Wi-Fi connection information view Wi-Fi connections Other pair with Bluetooth devices run at startup control vibration view network connections full network access prevent device from sleeping
USA, Illinois	Safer Illinois	2020-11-27 02:42:00	10000	3.2	73	2.9.4	2020-11-18	6.0 and up	University of Illinois	This app has access to: Location: approximate location (network-based) precise location (GPS and network-based) Photos / Media / Files: read the contents of your USB storage modify or delete the contents of your USB storage Storage: read the contents of your USB storage modify or delete the contents of your USB storage Camera: take pictures and videos Wi-Fi connection information: view Wi-Fi conn…
USA, Maryland	MD COVID Alert	2020-11-27 12:03:00	50000	3.9	129	minted12004	2020-11-10	5.0 and up	Maryland Department of Health	This app has access to: Other run at startup view network connections pair with Bluetooth devices full network access prevent device from sleeping
USA, Miami-Dade County, FL	CombatCOVID MDC	2020-11-27 18:43:00	1000	4.4	28	1.0.6	2020-11-19	5.1 and up	Miami-Dade County	This app has access to: Location precise location (GPS and network-based) Other receive data from Internet view network connections access Bluetooth settings full network access prevent device from sleeping pair with Bluetooth devices
USA, Michigan	MI COVID Alert	2020-11-27 12:33:00	100000	4.1	268	1.0	2020-11-20	6.0 and up	State of Michigan	This app has access to: Other view network connections full network access prevent device from sleeping pair with Bluetooth devices run at startup
USA, Minnesota	COVIDaware MN	2020-11-27 19:10:00	50000	4.2	180	1.1.1	2020-11-18	6.0 and up	State of Minnesota	This app has access to: Wi-Fi connection information view Wi-Fi connections Other view network connections pair with Bluetooth devices full network access run at startup control vibration prevent device from sleeping
USA, Nevada	Covid Trace Nevada	2020-11-27 00:21:30	50000	3.1	135	1.2.13	2020-11-15	7.0 and up	Nevada Division of Public and Behavioral Health	This app has access to: Device & app history: retrieve running apps Other: view network connections pair with Bluetooth devices full network access run at startup prevent device from sleeping
USA, New Jersey	COVID Alert NJ	2020-11-27 12:44:00	100000	4	442	1.0.1	2020-10-09	6.0 and up	State of New Jersey Applications	This app has access to: Wi-Fi connection information view Wi-Fi connections Other view network connections full network access pair with Bluetooth devices control vibration run at startup
USA, New York	COVID Alert NY	2020-11-27 12:58:00	100000	3.9	990	1.0.2	2020-10-05	6.0 and up	New York State Department of Health	This app has access to: Wi-Fi connection information view Wi-Fi connections Other full network access pair with Bluetooth devices run at startup control vibration view network connections
USA, North Carolina	SlowCOVIDNC	2020-11-27 12:18:00	100000	4.1	469	1.2	2020-11-05	6.0 and up	NC Department of Health and Human Services	This app has access to: Other full network access prevent device from sleeping view network connections pair with Bluetooth devices run at startup
USA, North Dakota	Care19 Diary	2020-11-29 17:56:00	50000	3.2	264	3.1	2020-06-26	6.0 and up	ProudCrowd, LLC	This app has access to: Other receive data from Internet run at startup view network connections pair with Bluetooth devices full network access prevent device from sleeping
USA, North Dakota	Care19 Alert	2020-11-27 16:21:00	10000	3.4	78	1.1	2020-09-27	6.0 and up	ProudCrowd, LLC	This app has access to: Other receive data from Internet run at startup view network connections pair with Bluetooth devices full network access prevent device from sleeping
USA, Northern California	Everbridge Contact Tracer	2020-11-29 17:04:00	500000	2.8	1178	20.2.4	2020-11-23	6.0 and up	Everbridge, Inc.	This app has access to: Photos/Media/Files access USB storage filesystem modify or delete the contents of your USB storage read the contents of your USB storage Device ID & call information read phone status and identity Location precise location (GPS and network-based) access extra location provider commands approximate location (network-based) Phone read phone status and identity directly call …
USA, Oregon	Oregon Exposure Notifications	2020-11-27 16:36:00	1000			Varies with device	2020-11-04	Varies with device	Oregon Health Authority	This app has access to: Other view network connections full network access prevent device from sleeping pair with Bluetooth devices run at startup
USA, Palm Beach County, CA	CombatCOVID PBC	2020-11-26 23:26:36	5000	3.8	40	1.0.5	2020-08-28	5.1 and up	Palm Beach County BoCC	This app has access to: Location: precise location (GPS and network-based) Other: receive data from Internet access Bluetooth settings full network access prevent device from sleeping view network connections pair with Bluetooth devices
USA, Pennsylvaia	COVID Alert PA	2020-11-27 13:09:00	100000	3.6	740	1.0.1.18	2020-09-11	6.0 and up	Commonwealth of Pennsylvania	This app has access to: Wi-Fi connection information view Wi-Fi connections Other view network connections full network access pair with Bluetooth devices control vibration run at startup
USA, Rhode Island	CRUSH COVID RI	2020-11-27 18:59:00	10000	3.3	295	2.2	2020-10-02	8.0 and up	State of Rhode Island	This app has access to: Location precise location (GPS and network-based) Wi-Fi connection information view Wi-Fi connections Other receive data from Internet view network connections full network access run at startup prevent device from sleeping
USA, South Carolina	SC Safer Together	2020-11-28 00:46:00	100			Varies with device	2020-11-20	Varies with device	MUSC Mobile Development	This app has access to: Other receive data from Internet view network connections full network access prevent device from sleeping pair with Bluetooth devices control vibration run at startup
USA, South Dakota	Care19 Diary	2020-11-29 17:56:00	50000	3.2	264
USA, Southern Washington	Everbridge Contact Tracer	2020-11-29 17:04:00	500000	2.8	1178	20.2.4	2020-11-23	6.0 and up	Everbridge, Inc.	This app has access to: Photos/Media/Files access USB storage filesystem modify or delete the contents of your USB storage read the contents of your USB storage Device ID & call information read phone status and identity Location precise location (GPS and network-based) access extra location provider commands approximate location (network-based) Phone read phone status and identity directly call …
USA, Utah	Healthy Together - COVID-19	2020-11-27 01:40:00	50000	3.6	521	1.4.0	2020-11-19	7.0 and up	Twenty Inc.	This app has access to: Contacts: read your contacts Camera: take pictures and videos Location: precise location (GPS and network-based) Wi-Fi connection information: view Wi-Fi connections Other: receive data from Internet access Bluetooth settings prevent device from sleeping pair with Bluetooth devices run at startup full network access view network connections control vibration
USA, Virginia	COVIDWISE	2020-11-27 00:55:40	100000	3.9	970	1.0	2020-08-28	6.0 and up	VDH	This app has access to: Other: view network connections pair with Bluetooth devices full network access run at startup prevent device from sleeping
USA, Washington	WA Exposure Notifications	2020-11-27 16:59:00	1000			Varies with device	2020-10-29	Varies with device	Washington Department of Health	This app has access to: Other view network connections full network access prevent device from sleeping pair with Bluetooth devices run at startup
USA, Western Oregon	Everbridge Contact Tracer	2020-11-29 17:04:00	500000	2.8	1178	20.2.4	2020-11-23	6.0 and up	Everbridge, Inc.	This app has access to: Photos/Media/Files access USB storage filesystem modify or delete the contents of your USB storage read the contents of your USB storage Device ID & call information read phone status and identity Location precise location (GPS and network-based) access extra location provider commands approximate location (network-based) Phone read phone status and identity directly call …
USA, Wyoming	Care19 Diary	2020-11-29 17:56:00	50000	3.2	264
USA, Wyoming	Care19 Alert	2020-11-27 16:21:00	10000	3.4	78
Vietnam	BlueZone	2020-11-26 22:59:06	10000000	4.5	97575	3.0.6	2020-10-28	6.0 and up	Cục Tin học hóa, Bộ Thông tin và Truyền thông	This app has access to: Location: precise location (GPS and network-based) approximate location (network-based) Photos/Media/Files: read the contents of your USB storage modify or delete the contents of your USB storage Storage: read the contents of your USB storage modify or delete the contents of your USB storage Wi-Fi connection information: view Wi-Fi connections Other: receive data from Inte…

## Sheet: AppStore
Timestamp	Untitled Question	Date of data extraction	Rating	Number of ratings	Version history - Launched	Version history - Last update	Current version	Seller	Category	Compatibility	Languages	AppName ID	Country
2020-09-21 15:56:54		2020-01-02	1	1	2020-01-22	2022-01-22	d	d	d	dd	dd	2s	d
2020-09-22 11:54:24		2020-09-22	4.1	11900	2020-04-26	2020-09-10	1.11	Department of Health, Australian Capital Territory	Health & Fitness	Requires iOS 10.0 or later. Compatible with iPhone, iPad and iPod touch.	English, Arabic, Greek, Italian, Korean, Punjabi, Simplified Chinese, Traditional Chinese, Turkish, Vietnamese	COVIDSafe	Australia
2020-09-22 12:26:32		2020-09-22	3	382	2020-03-27	2020-07-09	2.0.5	Osterreichisches Rotes Kreuz	Medizin	Erfordert iOS 13.5 oder neuer. Kompatibel mit iPhone.	Deutsch, Englisch	Stopp Corona	Austria
2020-09-22 12:33:10		2020-09-22	2.7	21	2020-05-25	2020-09-10	1.4.7	Data Processing Center of the Ministry of Communications and High Technologies	Health & Fitness	Requires iOS 11.0 or later. Compatible with iPhone, iPad and iPod touch.	English, Azerbaijani, Russian	e-Tabib	Azerbaijan
2020-09-22 12:40:28		2020-09-22	4.7	693	2020-03-28	2020-09-15	0.21.0	eGovernment Authority Bahrain	Health & Fitness	Requires iOS 11.0 or later. Compatible with iPhone, iPad and iPod touch.	English, Dutch, French, German, Italian, Portuguese	BeAware Bahrain	Bahrain
2020-09-22 12:51:12		2020-09-22	2.5	6	2020-05-02	2020-07-23	2	G2C Office, Royal Government of Bhutan	Health & Fitness	Requires iOS 9.0 or later. Compatible with iPhone, iPad, and iPod touch.	English	Druk Trace	Bhutan
2020-09-22 12:56:04		2020-09-22	3.5	112	2020-07-10	2020-08-13	2.3.8	Governo do Brasil	Health & Fitness	Requires iOS 13.5 or later. Compatible with iPhone, iPad, and iPod touch.	English	Coronavirus SUS	Brazil
2020-09-22 13:02:23		2020-09-22	5	1	2020-05-12	2020-09-15	2.7.2	ATI - AGENCIA ESTADUAL DE TECNOLOGIA DA INFORMACAO	Saúde e fitness	Requer o iOS 9.0 ou posterior. Compatível com iPhone, iPad e iPod touch.	Inglês	Dycovid - Dynamic Contact Tracing	Brazil
2020-09-23 10:06:18		2020-09-23	3.8	184	2020-04-06	2020-05-27	1.0.4	COUNCIL OF MINISTERS	Health & Fitness	Requires iOS 10.0 or later. Compatible with iPhone, iPad and iPod touch.	English, Albanian, Bulgarian, Macedonian	ViruSafe	Bulgaria
2020-09-23 10:14:04		2020-09-23	2.7	518	2020-05-01	2020-06-18	1.2.0	Government Of The Province Of Alberta	Health & Fitness	Requires iOS 11.0 or later. Compatible with iPhone, iPad and iPod touch.	English	ABTraceTogether	Canada-Alberta
2020-09-23 10:18:56		2020-09-23	4.9	67	2020-07-30	2020-09-22	1.0.8	Health Canada	Medical	Requires iOS 13.5 or later. Compatible with iPhone.	English, French	COVID Alert	Canada
2020-09-23 10:23:23		2020-09-23	3.2	3400	2020-03-20	2020-09-02	1.0.29	Instituto Nacional de Salud	Salud y forma física	Requiere iOS 10.3 o posterior. Compatible con iPhone, iPad y iPod touch.	Inglés	CoronApp-Colombia	Colombia
2020-09-23 13:48:49		2020-09-23	4	4	2020-05-15	2020-05-23	2.0.1	Deputy Ministry for Research, Innovation & Digital Policy	Health & Fitness	Requires iOS 9.0 or later. Compatible with iPhone, iPad and iPod touch.	English	CovTracer	Cyprus
2020-09-23 13:54:27		2020-09-23	3.7	624	2020-05-03	2020-09-21	2.1.2	Ministerstvo zdravotnictvi	Health & Fitness	Requires iOS 13.5 or later. Compatible with iPhone.	English, Czech	eRouška	Czech Republic
2020-09-23 14:03:05		2020-09-23	4.1	678	2020-06-17	2020-08-17	1.1	Sundheds- og Ældreministeriet	Medicinsk	Kræver iOS 13.5 eller en nyere version. Kompatibel med iPhone.	Not mentioned	Smitte|stop	Denmark
2020-09-23 14:06:22		2020-09-23	5	3	2020-08-19	2020-09-16	1.3.2	Health and Welfare Information Systems Centre	Health & Fitness	Requires iOS 13.5 or later. Compatible with iPhone.	English, Estonian, Russian	Hoia	Estonia
2020-09-23 21:07:28		2020-09-23	4.3	11	2020-06-14	2020-09-20	1.3	Government of the Republic of Fiji	Medical	Requires iOS 10.0 or later. Compatible with iPhone, iPad and iPod touch.	English	careFIJI	Fiji
2020-09-23 21:12:16		2020-09-23	4.6	1700	2020-08-31	2020-09-23	1.0.2	National Institute for Health and Welfare	Medical	Requires iOS 13.5 or later. Compatible with iPhone.	Finnish, Swedish	Koronavilkku	Finland
2020-09-23 21:23:53		2020-09-23	4	30	2020-06-02	2020-09-15	1.2.0	Gouvernement Francais	Health & Fitness	Requires iOS 11.4 or later. Compatible with iPhone, iPad, and iPod touch.	English, Arabic, French, German, Italian, Portuguese, Spanish	StopCovid France 4+	France
2020-09-23 21:27:40		2020-09-23	4.6	261	2020-04-12	2020-04-20	1.1	Ministry of IDPs, Labour, Health & Social Affairs	Medical	Requires iOS 11.0 or later. Compatible with iPhone, iPad, and iPod touch.	English, Georgian	Stop Covid	Georgia
2020-09-23 21:31:17		2020-09-23	4.4	48.786	2020-06-15	2020-09-04	1.3.0	Robert Koch-Institut	Gesundheit und Fitness	Erfordert iOS 13.5 oder neuer. Kompatibel mit iPhone.	Deutsch, Bulgarisch, Englisch, Polnisch, Rumänisch, Türkisch	Corona-Warn-App	Germany
2020-09-23 21:35:42		2020-09-23	4	6	2020-04-26	2020-09-01	1.0.2	MINISTRY OF COMMUNICATIONS	Health & Fitness	Requires iOS 9.0 or later. Compatible with iPhone, iPad, and iPod touch.	English	GH COVID-19 Tracker	Ghana
2020-09-23 21:39:59		2020-09-23	4.1	17	2020-06-17	2020-06-20	1.0.1	Gibraltar Health Authority	Medical	Requires iOS 13.0 or later. Compatible with iPhone.	English	Beat COVID Gibraltar	Gibraltar
2020-09-24 08:29:45		2020-09-24	3.4	42	2020-04-02	2020-07-20	2.1.2	Landlaeknisembaettid	Lifestyle	Requires iOS 9.0 or later. Compatible with iPhone, iPad, and iPod touch.	English	Rakning C-19	Iceland
2020-09-24 18:38:30		2020-09-24	3.6	1400	2020-05-08	2020-09-09	1.2.23	Government Of Punjab	Health & Fitness	Requires iOS 10.3 or later. Compatible with iPhone, iPad and iPod touch.	English, Hindi, Punjabi	COVA Punjab	India
2020-09-24 18:49:44		2020-09-24	3.7	1000	2020-04-13	2020-09-02	2.4.0	Kementerian Komunikasi dan Informatika Republik Indonesia	Health & Fitness	Requires iOS 10.0 or later. Compatible with iPhone, iPad and iPod touch.	English	PeduliLindungi	Indonesia
2020-09-24 18:57:11		2020-09-24	4.3	1000	2020-07-06	2020-08-27	1.0.2	Health Service Executive	Medical	Requires iOS 11.0 or later. Compatible with iPhone.	English, Irish, Portuguese	COVID Tracker Ireland	Ireland
2020-09-24 19:02:21		2020-09-24	2.9	69	2020-03-22	2020-09-01	2.2.14	Israel Ministry of Health	Health & Fitness	Requires iOS 10.0 or later. Compatible with iPhone, iPad, and iPod touch.	English	HaMagen	Israel
2020-09-24 23:29:57		2020-09-25	3.9	44	2020-06-01	2020-09-15	1.4.0	Ministero della Salute	Medical	Requires iOS 13.0 or later. Compatible with iPhone.	English, French, German, Italian, Spanish	Immuni	Italy
2020-09-24 23:33:25		2020-09-25	3.5	17	2020-06-19	2020-09-24	1.1.4	Ministry of Health, Labour and Welfare - Japan	Medical	Requires iOS 13.5 or later. Compatible with iPhone.	English, Chinese, Japanese	COCOA - COVID-19 Contact App 4+	Japan
2020-09-24 23:37:56		2020-09-25	4	95	2020-05-30	2020-09-19	1.1	Jordan eGovernment	Reference	Requires iOS 9.0 or later. Compatible with iPhone, iPad, and iPod touch.	English	AMAN	Jordan
2020-09-24 23:42:43		2020-09-25	4	201	2020-04-10	2020-06-22	1.0.5	The Central Agency for Information Technology	Health & Fitness	Requires iOS 10.0 or later. Compatible with iPhone, iPad, and iPod touch.	English	Shlonik	Kuwait
2020-09-24 23:46:08		2020-09-25	5	6	2020-05-28	2020-09-04	1.3.9	Slimibu Profilakses un Kontroles Centrs	Medical	Requires iOS 13.5 or later. Compatible with iPhone.	English, Latvian, Russian	Apturi Covid Latvia	Latvia
2020-09-25 09:33:52		2020-09-25	3.4	14	2020-05-05	2020-09-18	2.0.2	State Service Modernisation Unit, Chief Minister's Department	Health & Fitness	Requires iOS 10.0 or later. Compatible with iPhone, iPad and iPod touch.	English	COVIDTrace Sarawak	Malaysia-Sarawak
2020-09-25 10:12:18		2020-09-25	5	1	2020-03-25	2020-05-12	1.4	Secretaria de Finanzas - Gobierno del Estado de Jalisco	Health & Fitness	Requires iOS 9.0 or later. Compatible with iPhone, iPad, and iPod touch.	English	Plan Jalisco Covid-19	Mexico
2020-09-25 10:16:26		2020-09-25	4.2	557	2020-04-06	2020-05-18	2.0.1	INFOTEC, Centro de Investigacion e Innovacion en Tecnologias de la Informacion y Comunicacion	Salud y forma física	Requiere iOS 11.0 o posterior. Compatible con iPhone, iPad y iPod touch.	Español	COVID-19MX	Mexico
2020-09-25 10:19:53		2020-09-25	4.7	3	2020-04-19	2020-05-27	1.0.1	Gobierno del Estado de Nuevo Leon	Health & Fitness	Requires iOS 8.0 or later. Compatible with iPhone, iPad, and iPod touch.	English	CovidRadar.mx	Mexico
2020-09-25 10:25:29		2020-09-25	4.5	119	2020-05-26	2020-08-26	1.0.3	Ministry of interior morocco	Medical	Requires iOS 10.0 or later. Compatible with iPhone, iPad, and iPod touch.	English, Arabic, French	Wiqaytna	Morocco
2020-09-25 10:32:06		2020-09-25	4.1	2400	2020-08-11	2020-09-15	1.0.7	Rijksoverheid	Medical	Requires iOS 13.5 or later. Compatible with iPhone.	English, Arabic, Bulgarian, Dutch, French, German, Polish, Romanian, Spanish, Turkish	CoronaMelder	Netherlands
2020-09-25 10:36:14		2020-09-25	3.2	1500	2020-05-19	2020-09-22	1.5.0	Ministry Of Health (NZ)	Health & Fitness	Requires iOS 10.0 or later. Compatible with iPhone, iPad and iPod touch.	English	NZ COVID Tracer	New Zealand
2020-09-25 10:42:01		2020-09-25	4.4	50	2020-04-12	2020-07-17	1.1.1	Ministerstvo za informatichko opshtestvo i administracija Skopje	Social Networking	Requires iOS 11.0 or later. Compatible with iPhone, iPad and iPod touch.	English, Albanian, Macedonian	StopKorona!	North Macedonia
2020-09-25 10:51:26		2020-09-25	1.8	13	2020-05-03	2020-09-24	1.1.3	Ministry of Health, Sultanate of Oman	Medical	Requires iOS 10.0 or later. Compatible with iPhone, iPad and iPod touch.	English	HMushrif	Oman
2020-09-25 10:55:32		2020-09-25	4.6	34	2020-06-13	2020-08-16	1.1	Philippine Red Cross	Medical	Requires iOS 11.2 or later. Compatible with iPhone, iPad and iPod touch.	English	RC143	Philippines
2020-09-25 11:05:18		2020-09-25	2.9	188	2020-05-24	2020-09-24	2.0.13	Multisys Technologies Corporation	Social Networking	Requires iOS 13.0 or later. Compatible with iPhone, iPad and iPod touch.	English	StaySafePH	Philippines
2020-09-25 11:10:25		2020-09-25	3	2	2020-04-30	2020-09-20	4.4.0	Ministerstwo Cyfryzacji	Medical	Requires iOS 12.1 or later. Compatible with iPhone, iPad, and iPod touch.	English, German, Polish, Ukrainian	STOP COVID - ProteGO Safe 17+	Poland
2020-09-25 11:14:53		2020-09-25	4.2	574	2020-08-28	2020-09-22	1.0.3	FCT - FUNDACAO PARA A CIENCIA E A TECNOLOGIA I.P.	Medicina	Requer o iOS 13.5 ou posterior. Compatível com iPhone.	Português, Inglês	STAYAWAY COVID	Portugal
2020-09-25 11:19:59		2020-09-25	3.5	1400	2020-04-25	2020-08-10	6.1	Ministry of Interior	Health & Fitness	Requires iOS 13.1 or later. Compatible with iPhone, iPad, and iPod touch.	English, Arabic	EHTERAZ	Qatar
2020-09-25 11:27:03		2020-09-25	4.4	1600	2020-06-12	2020-08-30	1.4	NATIONAL INFORMATION CENTER	Health & Fitness	Requires iOS 13.5 or later. Compatible with iPhone.	English, Amharic, Arabic, Bengali, Burmese, Filipino, French, German, Hindi, Indonesian, Japanese, Kazakh, Korean, Malay, Portuguese, Russian, Simplified Chinese, Singhalese, Spanish, Swahili, Turkish, Urdu	Tabaud (COVID-19 KSA)	Saudi Arabia
2020-09-25 11:31:32		2020-09-25	3	31	2020-03-14	2020-06-03	2.2.3	Swift Office LLP	Productivity	Requires iOS 11.0 or later. Compatible with iPhone, iPad and iPod touch.	English	SwiftMED	Singapore
2020-09-25 11:37:51		2020-09-25	4	2	2020-03-18	2020-09-21	2.3.3	Government Technology Agency	Medical	Requires iOS 10.0 or later. Compatible with iPhone, iPad and iPod touch.	English, Bengali, Burmese, Hindi, Malay, Simplified Chinese, Tamil, Thai	TraceTogether	Singapore
2020-09-25 11:43:03		2020-09-25	3.4	17	2020-05-24	2020-06-17	1.11	Government Technology Agency	Utilities	Requires iOS 10.0 or later. Compatible with iPhone, iPad and iPod touch.	English	SafeEntry (Business)	Singapore
2020-09-25 11:49:39		2020-09-25	2.6	170	2020-03-29	2020-07-28	3.1	Osakidetza	Utilidades	Requiere iOS 12.0 o posterior. Compatible con iPhone, iPad y iPod touch.	Español, Euskera, Inglés	COVID-19.eus	Spain
2020-09-25 11:52:44		2020-09-25	3	3	2020-07-07	2020-09-16	1.0.7	Ministerio de Asuntos Economicos y Transformacion Digital	Health & Fitness	Requires iOS 13.5 or later. Compatible with iPhone.	English	Radar Covid	Spain
2020-09-25 11:55:41		2020-09-25	4.7	38	2020-06-02	2020-08-31	1.0.9	Bundesamt für Gesundheit BAG	Medical	Requires iOS 13.5 or later. Compatible with iPhone.	English, Albanian, Bosnian, Croatian, French, German, Italian, Portuguese, Rhaeto-Romance, Serbian, Spanish, Tigrinya, Turkish	SwissCovid	Switzerland
2020-09-25 13:05:10		2020-09-25	4.5	79	2020-04-18	2020-04-25	1.2	Health Tech Cluster Switzerland	Medizin	Erfordert iOS 10.0 oder neuer. Kompatibel mit iPhone, iPad und iPod touch.	Englisch	geoHealthApp Covid19 Tracker 4+	Switzerland
2020-09-25 13:11:18		2020-09-25	3.6	127	2020-04-06	2020-05-27	1.8.1	Electronic Government Agency	Utilities	Requires iOS 9.0 or later. Compatible with iPhone, iPad and iPod touch.	English, Thai	MorChana	Thailand
2020-09-25 13:12:56		2020-09-25	1	1	2020-08-01	2020-08-03	1.0.1	Ministry of Posts, Digital Economy and Technological Innovations	Medical	Requires iOS 12.0 or later. Compatible with iPhone, iPad, and iPod touch.	English, French	TOGO SAFE	Togo
2020-09-25 13:15:49		2020-09-25	5	2	2020-06-02	2020-06-09	1.1	Observatoire National des Maladies Nouvelles et Emergentes	Medical	Requires iOS 10.0 or later. Compatible with iPhone, iPad, and iPod touch.	Arabic, French	E7mi	Tunisia
2020-09-25 13:23:42		2020-09-25	3.3	9600	2020-04-14	2020-09-18	2.0.13	T.C. Saglik Bakanligi	Health & Fitness	Requires iOS 10.0 or later. Compatible with iPhone, iPad and iPod touch.	English, Turkish	Hayat Eve Sığar	Turkey
2020-09-25 13:26:55		2020-09-25	4.1	21	2020-04-03	2020-04-17	1.1.2	Department of Health Abu Dhabi	Medical	Requires iOS 11.0 or later. Compatible with iPhone, iPad, and iPod touch.	English	TraceCovid	UAE
2020-09-25 13:30:17		2020-09-25	3.5	392	2020-04-07	2020-08-07	1.42.2	Ministry of health	Medical	Requires iOS 11.0 or later. Compatible with iPhone, iPad and iPod touch.	English, Arabic, Hindi	ALHOSN UAE	UAE
2020-09-25 13:33:21		2020-09-25	3.7	299	2020-07-30	2020-08-19	1.0.1	Health & Social Care Board	Medical	Requires iOS 13.0 or later. Compatible with iPhone.	English	StopCOVID NI	United Kingdom
2020-09-25 13:39:35		2020-09-25	4.2	580	2020-03-20	2020-07-02	4.1.1	Agencia de gobierno electr�nico y sociedad de la informaci�n	Utilities	Requires iOS 10.0 or later. Compatible with iPhone, iPad and iPod touch.	Spanish	Coronavirus UY	Uruguay
2020-09-25 13:44:04		2020-09-25	4.7	6400	2020-04-22	2020-09-18	1.3.5	Twenty Holdings, Inc.	Health & Fitness	Requires iOS 12.0 or later. Compatible with iPhone.	English, Haitian, Spanish	Healthy Together - COVID-19	USA-Utah
2020-09-25 14:09:51		2020-09-25	4.7	215	2020-05-11	2020-09-23	2.4.1	Expii, Inc.	Health & Fitness	Requires iOS 12.0 or later. Compatible with iPhone, iPad, and iPod touch.	English, French, Russian, Simplified Chinese, Spanish, Traditional Chinese	NOVID	USA-Allegheny County, Pennsylvania
2020-09-25 14:13:55		2020-09-25	3.8	535	2020-04-07	2020-08-19	3.6	State of North Dakota	Medical	Requires iOS 13.0 or later. Compatible with iPhone, iPad, and iPod touch.	English	Care19 Diary	USA-North Dakota, South Dakota, Wyoming
2020-09-25 14:17:14		2020-09-25	4.2	13	2020-07-29	2020-09-21	1.0.7	County of Palm Beach	Health & Fitness	Requires iOS 12.0 or later. Compatible with iPhone, iPad, and iPod touch.	English, Spanish	CombatCOVID PBC	USA-Palm Beach County
2020-09-25 14:21:46		2020-09-25	3	114	2020-08-01	2020-09-12	2.5.8	University of Illinois at Urbana-Champaign	Health & Fitness	Requires iOS 11.0 or later. Compatible with iPhone, iPad, and iPod touch.	English, Chinese, Spanish	Safer Illinois	USA-Illinois
2020-09-25 14:26:28		2020-09-25	3.7	122	2020-03-16	2020-04-16	0.5.19	Massachusetts Institute of Technology	Utilities	Requires iOS 9.0 or later. Compatible with iPhone, iPad, and iPod touch.	English	Private Kit	USA
2020-09-25 14:29:22		2020-09-25	4.7	70	2020-08-16	2020-09-16	0.0.17	Alabama Department of Public Health	Health & Fitness	Requires iOS 13.5 or later. Compatible with iPhone.	English	GuideSafe	USA-Alabama
2020-09-25 14:32:46		2020-09-25	4.4	48	2020-08-18	2020-09-16	1.0.2	Arizona Department of Health Services	Medical	Requires iOS 13.6 or later. Compatible with iPhone.	English	Covid Watch Arizona	USA-Arizona
2020-09-25 14:35:38		2020-09-25	3.3	99	2020-08-22	2020-09-25	1.2.11	Nevada Division of Public and Behavioral Health	Medical	Requires iOS 13.5 or later. Compatible with iPhone.	English	COVID Trace Nevada 4+	USA-Nevada
2020-09-25 14:39:55		2020-09-25	4.7	799	2020-08-05	2020-08-27	1.21	Virginia Department of Health	Health & Fitness	Requires iOS 13.5 or later. Compatible with iPhone.	English, Spanish	COVIDWISE	USA-Virginia
2020-09-25 14:45:15		2020-09-25	4.5	55	2020-05-03	2020-08-04	1.3.1	Path Check, Inc	Utilities	Requires iOS 9.0 or later. Compatible with iPhone, iPad, and iPod touch.	English, Arabic, Danish, Dutch, French, Haitian, Indonesian, Italian, Malayalam, Polish, Portuguese, Romanian, Russian, Slovak, Spanish, Tagalog, Traditional Chinese, Vietnamese	PathCheck SafePlaces	USA-Haiti, Guam, Puerto Rico, and Teton County, Wyoming
2020-09-25 14:51:17		2020-09-25	3.1	45	2020-06-26	2020-08-30	1.5.0	sp0n, Inc.	Health & Fitness	Requires iOS 11.0 or later. Compatible with iPhone, iPad, and iPod touch.	English	Citizen SafePass	USA-San Joaquin County, CA
2020-09-25 14:58:21		2020-09-25	4.2	19000	2020-04-18	2020-09-18	3.0.3	AUTHORITY OF INFORMATION TECHNOLOGY APPLICATION	Health & Fitness	Requires iOS 10.3 or later. Compatible with iPhone, iPad and iPod touch.	English	Bluezone - Contact detection 4+	Vietnam
2020-11-06 22:39:01		2020-11-06	4.1	1200	2020-04-26	2020-10-13	1.13	N/A	N/A	N/A	N/A	COVIDSafe	Australia
2020-11-06 22:42:42		2020-11-06	2.9	519	2020-03-27	2020-10-21	2.0.7	N/A	N/A	N/A	N/A	Stopp Corona	Austria
2020-11-06 22:46:13		2020-11-06	2.9	29	2020-05-25	2020-09-10	1.4.7	N/A	N/A	N/A	N/A	e-Tabib	Azerbaijan
2020-11-06 22:48:48		2020-11-06	4.7	708	2020-03-28	2020-11-04	0.25.0	N/A	N/A	N/A	N/A	BeAware Bahrain	Bahrain
2020-11-06 22:52:49		2020-11-06	2.5	6	2020-05-02	2020-07-23	2	N/A	N/A	N/A	N/A	Druk Trace	Bangladesh
2020-11-07 10:13:46		2020-11-07	3.5	113	2018-07-12	2020-11-04	2.3.9	N/A	N/A	N/A	N/A	Coronavírus - SUS	Brazil
2020-11-07 10:17:06		2020-11-07	5	1	2020-05-12	2020-09-15	2.7.2	N/A	N/A	N/A	N/A	Dycovid	Brazil
2020-11-07 10:19:32		2020-11-07	3.8	186	2020-04-06	2020-05-27	1.0.4	N/A	N/A	N/A	N/A	ViruSafe	Bulgaria
2020-11-07 10:22:23		2020-11-07	2.5	593	2020-05-01	2020-09-24	1.4.0	N/A	N/A	N/A	N/A	ABTraceTogether	Canada
2020-11-07 10:27:13		2020-11-07	4.8	84	2020-07-30	2020-11-06	1.1.1	N/A	N/A	N/A	N/A	COVID Alert	Canada
2020-11-07 10:31:39		2020-11-07	3.2	4500	2020-03-29	2020-10-06	1.0.33	N/A	N/A	N/A	N/A	CoronApp-Colombia	Colombia
2020-11-07 11:07:36		2020-11-07	4.5	83	2020-07-27	2020-10-13	1.1.0	N/A	N/A	N/A	N/A	Stop COVID-19	Croatia
2020-11-07 11:11:06		2020-11-07	4	4	2020-05-15	2020-05-23	2.0.1	N/A	N/A	N/A	N/A	CovTracer	Cyprus
2020-11-07 11:18:27		2020-11-07	3.9	1400	2020-05-03	2020-10-26	2.1.4	N/A	N/A	N/A	N/A	eRouška	Czech Republic
2020-11-07 11:35:15		2020-11-07	3.9	805	2020-06-17	2020-10-27	1.2	N/A	N/A	N/A	N/A	Smitte|stop	Denmark
2020-11-07 11:39:33		2020-11-07	5	3	2020-08-19	2020-09-30	1.3.3	N/A	N/A	N/A	N/A	Hoia	Estonia
2020-11-07 11:43:32		2020-11-07	4.3	11	2020-09-20	2020-06-14	1.3	N/A	N/A	N/A	N/A	careFIJI	Fiji
2020-11-07 11:45:57		2020-11-07	4.5	1900	2020-08-31	2020-10-22	1.2.0	N/A	N/A	N/A	N/A	Koronavilkku	Finland
2020-11-08 13:01:05		2020-11-08	3.8	52	2020-06-02	2020-11-04	2.1.3	N/A	N/A	N/A	N/A	TousAntiCovid	France
2020-11-08 13:03:37		2020-11-08	4.6	266	2020-04-12	2020-04-20	1.1	N/A	N/A	N/A	N/A	Stop Covid	Georgia
2020-11-08 13:05:53		2020-11-08	4.4	52.333	2020-06-15	2020-10-29	1.5.3	N/A	N/A	N/A	N/A	Corona-Warn-App	Germany
2020-11-08 13:07:59		2020-11-08	4	6	2020-04-26	2020-09-01	1.0.2	N/A	N/A	N/A	N/A	GH COVID-19 Tracker	Ghana
2020-11-08 13:10:51		2020-11-08	4.1	17	2020-06-17	2020-06-20	1.0.1	N/A	N/A	N/A	N/A	Beat COVID Gibraltar	Gibraltar
2020-11-08 13:14:48		2020-11-08	3.4	42	2020-04-02	2020-07-20	2.1.2	N/A	N/A	N/A	N/A	Rakning C-19	Iceland
2020-11-08 13:17:31		2020-11-08	4.5	189600	2020-04-02	2020-07-06	2.0.0	N/A	N/A	N/A	N/A	AarogyaSetu	India
2020-11-08 13:19:56		2020-11-08	2	46	2020-04-23	2020-09-25	1.1.1	N/A	N/A	N/A	N/A	Corona_Watch	India
2020-11-08 13:22:18		2020-11-08	3.6	1400	2020-05-15	2020-10-28	1.2.25	N/A	N/A	N/A	N/A	COVA Punjab	India
2020-11-08 13:27:03		2020-11-08	3.7	1000	2020-04-13	2020-10-16	3.0.1	N/A	N/A	N/A	N/A	PeduliLindungi	Indonesia
2020-11-08 13:29:19		2020-11-08	4.2	1200	2020-07-06	2020-10-27	1.0.4	N/A	N/A	N/A	N/A	COVID Tracker Ireland	Ireland
2020-11-08 13:31:33		2020-11-08	2.9	69	2020-03-22	2020-09-01	2.2.14	N/A	N/A	N/A	N/A	HaMagen	Israel
2020-11-08 13:33:24		2020-11-08	3.8	48	2020-06-01	2020-11-03	2.1.4	N/A	N/A	N/A	N/A	Immuni	Italy
2020-11-08 21:51:50		2020-11-08	3.3	20	2020-06-19	2020-11-04	1.1.5	N/A	N/A	N/A	N/A	COCOA - COVID-19 Contact App	Japan
2020-11-08 21:57:18		2020-11-08	3.6	131	2020-05-30	2020-09-19	1.1	N/A	N/A	N/A	N/A	AMAN - Aman.jo JORDAN COVID-19	Jordan
2020-11-08 22:02:24		2020-11-08	3.8	235	2020-04-10	2020-11-01	2.0.1	N/A	N/A	N/A	N/A	Shlonik	Kuwait
2020-11-08 22:04:48		2020-11-08	5	6	2020-05-28	2020-10-30	1.4	N/A	N/A	N/A	N/A	Apturi Covid Latvia – SPKC	Latvia
2020-11-08 22:06:47		2020-11-08	2	10	2020-08-31	2020-10-31	1.1	N/A	N/A	N/A	N/A	MOPH Ma3an	Lebanon
2020-11-08 22:09:34		2020-11-08	3.2	15	2020-05-05	2020-09-18	2.0.2	N/A	N/A	N/A	N/A	COVIDTrace Sarawak	Malaysia
2020-11-09 17:44:11		2020-11-09	4.7	3	2020-04-19	2020-05-27	1.0.1	N/A	N/A	N/A	N/A	CovidRadar.mx	Mexico
2020-11-09 17:47:11		2020-11-09	4.2	560	2020-04-06	2020-05-18	2.0.1	N/A	N/A	N/A	N/A	COVID-19MX	Mexico
2020-11-09 17:49:46		2020-11-09	5	1	2020-03-25	2020-05-12	1.4	N/A	N/A	N/A	N/A	Plan Jalisco Covid-19	Mexico
2020-11-09 17:52:06		2020-11-09	4.4	123	2020-05-26	2020-08-26	1.0.3	N/A	N/A	N/A	N/A	Wiqaytna	Morocco
2020-11-09 20:34:13		2020-11-09	3.8	4700	2020-08-11	2020-10-26	1.0.11	N/A	N/A	N/A	N/A	CoronaMelder	Netherlands
2020-11-09 20:36:27		2020-11-09	3.2	1600	2020-05-19	2020-09-22	1.5.0	N/A	N/A	N/A	N/A	NZ COVID Tracer	New Zealand
2020-11-09 20:38:43		2020-11-09	4.4	50	2020-04-12	2020-07-17	N/A	N/A	N/A	N/A	N/A	StopKorona!	North Macedonia
2020-11-09 21:45:20		2020-11-09	2	22	2020-05-03	2020-10-24	1.1.5	N/A	N/A	N/A	N/A	HMushrif	Oman
2020-11-09 21:48:06		2020-11-09	4.6	38	2020-06-13	2020-08-16	1.1	N/A	N/A	N/A	N/A	RC143	Phillippines
2020-11-09 21:51:34		2020-11-09	2.9	205	2020-05-24	2020-09-24	2.0.13	N/A	N/A	N/A	N/A	StaySafePH	Phillippines
2020-11-09 21:54:10		2020-11-09	4.2	5	2020-04-30	2020-10-30	4.7.0	N/A	N/A	N/A	N/A	STOP COVID - ProteGO Safe	Poland
2020-11-09 22:00:56		2020-11-09	3.6	984	2020-08-28	2020-11-09	1.0.6	N/A	N/A	N/A	N/A	STAYAWAY COVID	Portugal
2020-11-09 22:03:58		2020-11-09	3.4	1500	2020-04-25	2020-08-10	6.1	N/A	N/A	N/A	N/A	EHTERAZ	Qatar
2020-11-10 23:43:06		2020-11-11	4.4	1700	2020-06-12	2020-08-30	1.4	N/A	N/A	N/A	N/A	Tabaud (COVID-19 KSA)	Saudi Arabia
2020-11-10 23:46:20		2020-11-11	3.4	19	2020-05-24	2020-06-17	1.11	N/A	N/A	N/A	N/A	SafeEntry (Business)	Singapore
2020-11-10 23:49:06		2020-11-11	3	31	2020-03-14	2020-06-03	2.2.3	N/A	N/A	N/A	N/A	SwiftMED	Singapore
2020-11-11 13:27:08		2020-11-11	2.4	5	2020-03-18	2020-10-22	2.4	N/A	N/A	N/A	N/A	TraceTogether	Singapore
2020-11-11 13:30:53		2020-11-11	2.6	174	2020-03-29	2020-07-28	3.1	N/A	N/A	N/A	N/A	COVID-19.eus	Spain
2020-11-11 13:33:11		2020-11-11	3	3	2020-07-07	2020-10-30	1.1.1	N/A	N/A	N/A	N/A	Radar Covid	Spain
2020-11-11 13:35:22		2020-11-11	4.5	79	2020-04-18	2020-04-25	1.2	N/A	N/A	N/A	N/A	geoHealthApp Covid19 Tracker	Switzerland
2020-11-11 13:37:26		2020-11-11	4.7	40	2020-06-02	2020-10-30	1.2	N/A	N/A	N/A	N/A	SwissCovid	Switzerland
2020-11-11 20:58:36		2020-11-11	3.7	128	2020-04-06	2020-05-27	1.8.1	N/A	N/A	N/A	N/A	MorChana - หมอชนะ	Thailand
2020-11-11 21:01:34		2020-11-11	1	2	2020-08-01	2020-08-03	1.0.1	N/A	N/A	N/A	N/A	TOGO SAFE	Togo
2020-11-11 21:04:03		2020-11-11	5	2	2020-06-02	2020-06-09	1.1	N/A	N/A	N/A	N/A	E7mi	Tunisia
2020-11-11 21:09:03		2020-11-11	3.3	10600	2020-04-14	2020-10-26	2.0.14	N/A	N/A	N/A	N/A	Hayat Eve Sığar	Turkey
2020-11-11 21:11:10		2020-11-11	3.5	495	2020-04-07	2020-11-11	1.42.5	N/A	N/A	N/A	N/A	ALHOSN UAE	UAE
2020-11-11 21:13:34		2020-11-11	4.1	21	2020-04-03	2020-04-17	1.1.2	N/A	N/A	N/A	N/A	UAE	TraceCovid
2020-11-11 21:19:29		2020-11-11	3.5	359	2020-07-30	2020-10-08	2.0.2	N/A	N/A	N/A	N/A	StopCOVID NI	United Kingdom
2020-11-12 15:38:48		2020-11-12	3.5	359	2020-07-30	2020-10-08	2.0.2	N/A	N/A	N/A	N/A	StopCOVID NI	Urugway
2020-11-12 15:41:17		2020-11-12	3.8	567	2020-04-07	2020-08-19	3.6	N/A	N/A	N/A	N/A	Care19 Diary	USA
2020-11-12 15:43:18		2020-11-12	3.4	188	2020-06-26	2020-10-30	1.7.0	N/A	N/A	N/A	N/A	Citizen SafePass	USA
2020-11-12 15:46:22		2020-11-12	3.4	17	2020-07-29	2020-11-04	1.0.8	N/A	N/A	N/A	N/A	CombatCOVID PBC	USA
2020-11-12 15:49:17		2020-11-12	3.1	112	2020-08-22	2020-09-25	1.2.11	N/A	N/A	N/A	N/A	COVID Trace Nevada	USA
2020-11-12 15:51:23		2020-11-12	4.3	54	2020-08-18	2020-10-13	1.0.4	N/A	N/A	N/A	N/A	Covid Watch Arizona	USA
2020-11-12 15:53:30		2020-11-12	4.7	827	2020-08-05	2020-08-27	1.21	N/A	N/A	N/A	N/A	COVIDWISE	USA
2020-11-12 16:16:46		2020-11-12	4.6	80	2020-08-16	2020-09-16	0.0.17	N/A	N/A	N/A	N/A	GuideSafe	USA
2020-11-12 16:19:06		2020-11-12	4.7	6800	2020-04-22	2020-11-11	1.4.0	N/A	N/A	N/A	N/A	Healthy Together - COVID-19	USA
2020-11-12 16:21:12		2020-11-12	4.7	220	2020-05-11	2020-10-29	2.4.5	N/A	N/A	N/A	N/A	NOVID	USA
2020-11-12 16:27:42		2020-11-12	4.5	55	2020-05-03	2020-08-04	1.3.1	N/A	N/A	N/A	N/A	PathCheck SafePlaces	USA
2020-11-12 16:30:26		2020-11-12	3.7	122	2020-03-16	2020-04-16	0.5.19	N/A	N/A	N/A	N/A	Private Kit	USA
2020-11-12 16:33:50		2020-11-12	2.9	134	2020-08-01	2020-10-12	2.7.4	N/A	N/A	N/A	N/A	Safer Illinois	USA
2020-11-12 16:37:12		2020-11-12	4.2	19300	2020-04-18	2020-10-28	3.0.6	N/A	N/A	N/A	N/A	Bluezone - Contact detection	Vietnam

## Sheet: Permissions
AppName ID	Country	modify system settings	update component usage statistics	send stycky broadcast	access USB storage filesystem	read sync settings	toggle sync on and off	read the contents of your USB storage	modify or delete the contents of your USB storage	manage doc storage	read phone status and identity	directly call phone numbers	read your contacts	read calendar events plus confidential information	add or modify calendar events and send email to guests without owners' knowledge	install shortcuts	uninstall shortcuts	view Wi-Fi connections	allow Wi-Fi Multicast reception	receive data from internet	view network connections	full network access	Google Play license check	change network connectivity	connect and disconnect from Wi-Fi	control Near Field Communication	record audio	Approximate location (network-based)	Precise location (GPS and network-based)	access extra location provider command	change your audio settings	prevent device from sleeping	control vibration	draw over other apps	Take pictures and videos	pair with Bluetooth devices	access Bluetooth settings	retrieve running apps	run at startup	find accounts on the device	add or remove accounts	read Google service config	create accounts and set passwords	Set alarm	access checkin properties	Disable your screen lock	Total nr of permissions	Total normal	% of total
#OstaniZdrav	Slovenia																				1	1										1				1			1								5	3	0.6
AarogyaSetu	India																			1	1	1						1	1			1			1	1	1		1								10	4	0.4
ABTraceTogether	Canada																	1				1							1							1	1		1								6	2	0.333333
Aggie-COVID-19	USA-NM							2	2									1			1	1		1	1			1	1	1						1	1		1	2							17	6	0.352941
Alertanoo	France																	1		1	1	1		1								1				1	1		1								9	5	0.555556
ALHOSN	UAE							2										1		1		1						1	1			1				1	1		1								11	4	0.363636
AlohaSafe Alert	USA-HA																	1			1	1										1	1			1			1								7	5	0.714286
AMAN	Jordan							2	2									1		1	1	1	1	1	1			1	1	1		1	1			0		1	1								18	8	0.444444
Apturi Covid Latvia	Latvia																			1	1	1										1				1			1								6	4	0.666667
ASI	Ecuador																				1	1										1				1			1								5	3	0.6
Bardghat Municipality - COVID-19/Disaster Response	Nepal							2	2			1								1	1	1						1	1	1		1	1			1											14	5	0.357143
Beat COVID Gibraltar	Gibraltar																	1			1	1														1											4	2	0.5
BeAware Bahrain	Bahrain							2	2					1	1					1	1	1						1	1	1		1				1	1	1	1								17	5	0.294118
Bharatpur Metropolitan | COVID-19 Response System	Nepal					1	1	2	2			1								1	1	1						1	1	1		1	1			1			1				1				18	7	0.388889
BinD360	Philippines																	1		1	1	1										1	1		1												7	5	0.714286
BlueZone	Vietnam							2	2											1	1	1							1			1	1			1	1		1								13	5	0.384615
BruHealth	Brunei							2	2		2	1		1	1			1		1	1	1					1	1	1	1	1	1	1		1	1	1		1								24	7	0.291667
CA Notify	USA																				1	1										1				1			1								5	3	0.6
Care19 Alert	USA-ND,WY																			1	1	1										1				1			1								6	4	0.666667
Care19 Diary	USA-ND,SD,WY																			1	1	1						1	1			1							1								7	4	0.571429
careFIJI	Fiji							2	2											1	1	1							1			1				1	1		1								12	4	0.333333
Check In CBR	Australia, Canberra																				1	1										1	1		1												5	3	0.6
‎Check In Qld	Australia, Queensland																				1	1										1	1		1				1								6	4	0.666667
‎Check in TAS	Australia, Tasmania																				1	1										1	1		1				1								6	4	0.666667
Citizen SafePass	USA, LA; San Joaquin			1				2	2		2		1					1		1	1	1						1	1			1			1	1	1		1								19	5	0.263158
CO Exposure Notifications	USA																				1	1										1				1			1								5	3	0.6
Coalition App | #StopCovid19	USA																			1	1	1						1	1			1				1	1		1								9	4	0.444444
CoBuddy - Covid19 Tool	Global							2	2		2							1		1	1	1						1	1			1			1				1						1		16	5	0.3125
COCOA COVID-19 Contact-Confirming Application	Japan																				1	1										1				1			1								5	3	0.6
CombatCOVID MDC	USA																			1	1	1							1			1				1	1										7	3	0.428571
CombatCOVID PBC	USA																			1	1	1							1			1				1	1										7	3	0.428571
Contak	Seychelles																				1	1										1			1				1								5	3	0.6
Corona Tracer BD	Bangladesh										2										1	1							1			1				1	1		1								9	3	0.333333
Corona Watch	India							2	2		2							1			1	1						1	1							0											11	2	0.181818
Corona-Warn-App	Germany																				1	1										1			1	1			1								6	3	0.5
Coronalert	Belgium																				1	1										1				1			1								5	3	0.6
CoronaMelder	Netherlands																				1	1										1				1			1								5	3	0.6
CoronApp	Colombia										2	1	1							1	1	1						1	1			1				1	1		1					1			14	5	0.357143
Coronavirus Algérie	Algeria							2	2		2									1	1	1						1	1			1	1			0			1								14	5	0.357143
Coronavirus SUS	Brazil																			1	1	1										1	1			1			1								7	5	0.714286
Coronavirus UY	Uruguay																			1	1	1		1			1					1	1		1	1			1								10	5	0.5
Coronika	Germany							2	2				2							1	1	1										1	1						1								12	5	0.416667
COVA Punjab	India							2	2											1	1	1						1	1			1	1		1	1	1										14	4	0.285714
COVI-ID	South Africa							2	2											1	1	1						1	1			1		1	1	0						1					13	4	0.307692
COVID Alert	Canada																	1			1	1										1				1		1	1								7	4	0.571429
COVID Alert CT	USA																				1	1										1				1			1								5	3	0.6
COVID Alert DE	USA																	1			1	1														1			1								5	3	0.6
COVID Alert Malta	Malta																				1	1										1				1			1								5	3	0.6
COVID Alert NJ	USA																	1			1	1											1			1			1								6	4	0.666667
COVID Alert NY	USA																	1			1	1											1			1			1								6	4	0.666667
COVID Alert PA	USA																	1			1	1											1			1			1								6	4	0.666667
COVID Alert South Africa	South Africa																				1	1										1				1			1								5	3	0.6
COVID Defense	USA, Louisiana																	1			1	1										1	1			1			1								7	5	0.714286
COVID Trace Nevada	USA																				1	1														1		1	1								5	2	0.4
COVID Tracker Ireland	Ireland																	1			1	1														1											4	2	0.5
COVID Watch Arizona	USA																				1	1										1				1			1								5	3	0.6
COVID-19 ERSDEL	Mongolia																				1	1										1				1			1								5	3	0.6
COVID-19.eus	Spain							2	2				1							1	1	1										1			1	0			1								11	4	0.363636
COVID-19MX	Mexico																			1	1	1						1	1			1	1			1	1		1								10	5	0.5
COVIDaware MN	USA																	1			1	1										1	1			1			1								7	5	0.714286
CovidRadar.mx	Mexico							2	2		2							1		1	1	1						1	1			1			1	1	1	1	1								18	5	0.277778
COVIDSafe	Australia																				1	1							1							1	1		1								6	2	0.333333
COVIDTrace	Malaysia																			1	1	1							1			1			1	1	1		1								9	4	0.444444
COVIDWISE	USA																				1	1										1				1			1								5	3	0.6
CovTracer	Cyprus					1	1	2	2									1		1	1	1	1					1	1	1		1				1	1		1				1				19	8	0.421053
CRUSH COVID RI	USA-RI																	1		1	1	1							1			1							1								7	5	0.714286
DC CAN	USA																				1	1										1				1			1								5	3	0.6
Druk Trace	Bhutan							2	2		2							1		1	1	1	1									1	1		1	0											14	6	0.428571
Dycovid - Dynamic Contact Tracing	Brazil																	1		1	1	1						1	1	1		1						1	1								10	6	0.6
e-Tabib	Azerbaijan											1						1		1	1	1						1	1			1				1	1		1								11	5	0.454545
E7mi	Tunisia																			1		1							1							1	1		1								6	2	0.333333
Ehteraz	Qatar							2	2		2	1								1	1	1						1	1			1		1		1	1		1							1	18	4	0.222222
eRouška	Czech Republic																			1	1	1						1	1			1				1	1		1								9	4	0.444444
eSalvar - Naga Contact Tracing for Establishments	Philippines																				1	1										1			1							1					5	3	0.6
Everbridge Contact Tracer	USA, Western Oregon, Northern California and Southern Washington			1	1			2	2		2	1						1		1	1	1			1	1		1	1	1	1	1	1		1	1	1		1								25	7	0.28
Exposure Notifications Settings Feature - MA	USA, Massachusetts																				1	1										1				1			1								5	3	0.6
geoHealthApp Covid19 Tracker	Switzerland	1						2	2	1	2		1	1	1			1		1	1	1					1	1	1		1	1	1	1	1	0			1			1					25	7	0.28
Gerak Malaysia	Malaysia		1					2	2		2							1		1	1	1						1	1			1		1	1	1						1					18	5	0.277778
GH COVID-19 Tracker	Ghana																	1			1	1						1	1																		5	2	0.4
Guam Covid Alert	Guam																	1			1	1										1	1			1			1								7	5	0.714286
GuideSafe	USA																				1	1										1				1			1								5	3	0.6
HaMagen	Israel																	1		1	1	1	1	1	1			1	1	1		1	1			1	1	1	1								16	8	0.5
Hayat Eve Sığar	Turkey							2	2				1					1		1	1	1						1	1			1			1	1	1		1			1					17	6	0.352941
Healthy Together - COVID-19	USA												1					1		1	1	1							1			1	1			1	1		1								11	6	0.545455
HMushrif	Oman					1	1	2	2		2							1		1	1	1						1	1	1		1	1	1		1	1		1				1				22	8	0.363636
HOIA	Estonia																				1	1										1				1			1								5	3	0.6
Immuni	Italy																				1	1										1				1			1								5	3	0.6
Jersey COVID Alert	United Kingdom-Jersey																	1			1	1											1			1			1								6	4	0.666667
Kenya Covid-19 Tracker	Kenya							2	2							1	1				1	1						1	1				1														11	3	0.272727
Korona Stop LT	Lithuania																				1	1										1			1	1			1								6	3	0.5
Koronavilkku	Finland																				1	1										1				1			1								5	3	0.6
Mahakavach	India							2	2			1	1							1	1	1						1	1			1	1		1	0			1	1	1		1				18	6	0.333333
Mascarilla Digital	Costa Rica																				1	1										1				1			1								5	3	0.6
MD COVID Alert	USA																				1	1										1				1			1								5	3	0.6
MI COVID Alert	USA																				1	1										1				1			1								5	3	0.6
MOPH Ma3an	Lebanon							2	2											1	1	1							1			1	1			1	1		1								13	5	0.384615
MorChana	Thailand							2	2									0		1	1	1	1					1	1	1		1	1		1	1	1	1	1								18	7	0.388889
MyTrace	Malaysia							2	2											1	1	1						1	1			1				1	1	1	1								14	4	0.285714
Nepal Trace	Nepal																	1		1	1	1						1	1			1				0	1		1								9	5	0.555556
NHS COVID-19	United Kingdom																				1	1										1			1	1			1								6	3	0.5
NHS COVID-19 App (pilot)	England, Isle of Wight																			1	1	1						1	1			1				1	1		1								9	4	0.444444
NM Notify	USA, New Mexico																				1	1										1				1			1								5	3	0.6
NOVID	USA																			1	1	1					1		1		1	1				1	1		1								10	4	0.4
NZ COVID Tracer	New Zealand																	1		1	1	1										1	1		1	1			1								9	6	0.666667
Oregon Exposure Notifications	USA, OR																				1	1										1				1			1								5	3	0.6
PathCheck SafePlaces (formerly COVID Safe Paths)	USA					1	1	2	2									1		1	1	1	1					1	1	1		1	1			1	1	1	1				1				21	9	0.428571
PeduliLindungi	Indonesia							2	2									1		1	1	1						1	1			1			1	1	1		1								15	5	0.333333
Plan Jalisco Covid-19	Mexico																			1	1	1						1				1				0											5	3	0.6
Private Kit	USA					1	1	2	2									1		1	1	1	1					1	1	1		1	1			1	1	1	1				1				21	9	0.428571
Protect Scotland	United Kingdom																	1			1	1											1			1			1								6	4	0.666667
Protégete Panamá	Panama																				1	1										1				1			1								5	3	0.6
Protego	United Kingdom																			1	1	1						1	1			1				1	1		1								9	4	0.444444
Radar Covid	Spain																			1	1	1										1				1			1								6	4	0.666667
Rakning C-19	Iceland					1	1	2	2		2									1	1	1						1	1	1		1		1	1	0			1			1	1				20	7	0.35
Rastrea el Virus	Puerto Rico																	1			1	1										1	1			1			1								7	5	0.714286
RC143	Philippines																			1	1	1						1	1			1				1	1		1								9	4	0.444444
SafeEntry - TraceTogether	Singapore	1						2	2	1	2		1	1	1	1		1		1	1	1					1	1	1		1	1	1	1	1				1			1					26	7	0.269231
Safer Illinois	USA							2	2									1		1	1	1						1	1			1			1	1	1		1								15	5	0.333333
SafeWA	Australia, WA																			1	1	1										1	1		1												6	4	0.666667
Saqbol	Kazakhstan																				1	1										1				1			1								5	3	0.6
SC Safer Together	USA																			1	1	1										1	1			1			1								7	5	0.714286
Shlonik	Kuwait			1				2	2		2									1	1	1					1	1	1	1	1	1	1		1	1	1	1	1								22	6	0.272727
SlowCOVIDNC	USA																				1	1										1				1			1								5	3	0.6
SM-COVID-19	Italy							2	2		2							1		1	1	1		1	1	1		1	1			1	1	1	1	1	1		1			1					23	7	0.304348
SMC COVID-19 Tracker	India							2	2		2							1		1	1	1			1			1	1			1			1	0			1	1							17	6	0.352941
Smitte|stop	Denmark																				1	1										1				1			1								5	3	0.6
Smittestopp	Norway																				1	1							1			1				1	1		1								7	3	0.428571
StayAway COVID	Portugal																	1			1	1										1				1			1								6	4	0.666667
StaySafePH	Philippines							2	2									1		1	1	1						1	1			1	1		1	1	1		1								16	6	0.375
Stop Covid	Georgia																	1		1	1	1			1	1		1	1			1	1			1	1		1								13	6	0.461538
STOP COVID - ProteGO Safe	Poland																			1	1	1							1			1				1	1		1								8	4	0.5
Stop COVID-19	Croatia																			1	1	1										1				1			1								6	4	0.666667
StopCOVID NI	United Kingdom																	1			1	1											1			1	1										6	3	0.5
StopKorona!	North Macedonia																			1	1	1						1	1			1				1	1										8	3	0.375
Stopp Corona	Austria																	1		1	1	1		1	1			1				1				1	1		1								11	5	0.454545
SwiftMED	Singapore													1	1			1		1	1	1			1		1	1	1		1	1	1	1	1	1	1		1								18	6	0.333333
SwissCovid	Switzerland																				1	1										1				1			1								5	3	0.6
Tabaud (COVID-19 KSA)	Saudi Arabia																			1	1	1										1				1			1								6	4	0.666667
Tarassud+	Oman							2	2											1	1	1						1	1			1	1		1	1	1		1								15	5	0.333333
The Territory Check In	Australia, Northern Territory																				1	1										1	1		1				1								6	4	0.666667
Tô de Olho	Brazil					1	1	2	2									1		1	1	1	1					1	1	1		1	1	1	1				1				1				20	9	0.45
TOGO SAFE	Togo																	1		1	1	1						1	1			1			1	1	1		1								11	5	0.454545
TousAntiCovid (StopCovid France)	France																				1	1						1	1			1			1	1	1		1								9	3	0.333333
TRACE Taguig	Philippines							2	2													1																									5	0	0
TraceCovid	UAE							2	2											1	1	1							1			1			1	1	1		1								13	4	0.307692
TraceEkee	Maldives																			1	1	1							1			1				1	1		1								8	4	0.5
TraceTogether	Singapore							2	2											1	1	1						1	1			1			1	1	1		1								14	4	0.285714
videmic Tracing	Germany, Bayreuth							2	2							1		1	1			1		1	1		1	1	1			1	1		1	1	1		1								19	4	0.210526
ViruSafe	Bulgaria																	1		1		1							1			1							1								6	4	0.666667
VírusRadar	Hungary																			1	1	1						1	1			1				1	1		1								9	4	0.444444
WA Notify	USA, WA																				1	1										1				1			1								5	3	0.6
WeHealth Bermuda	Bermuda																				1	1										1				1			1								5	3	0.6
WI Exposure Notification	USA, WI																				1	1										1				1			1								5	3	0.6
Wiqaytna	Morocco																			1	1	1							1			1				1	1		1								8	4	0.5
Госуслуги.COVID трекер	Russia																			1	1	1										1	1			1			1								7	5	0.714286
[truncated: 50 more columns]

## Sheet: Privacy and Policy Doc Assessm
App Name	Translated document?	Privacy Policy Document URL	Grade level*	Reading level	Readers' age	PTI - IA**	PTI - SG**	PTI Averaged	stdev
Coronavirus UY	Yes	https://www.gub.uy/ministerio-salud-publica/comunicacion/publicaciones/politica-privacidad-app-coronavirusuy	22.5	Very difficult to read	University graduate	25	40	32.5	10.6066
Alhosn	No	https://alhosnapp.ae/en/privacy-policy/	22	Very difficult to read	University graduate	35	30	32.5	3.53553
EHTERAZ	No	https://portal.moi.gov.qa/met2/privacyehteraz.html	20.4	Very difficult to read	University graduate	75	55	65	14.1421
Surokkha	No	https://surokkha.gov.bd/privacy-policy	18.4	Very difficult to read	University graduate	45	40	42.5	3.53553
LeaveHomeSafe	No	https://www.leavehomesafe.gov.hk/en/privacy/	17.9	Very difficult to read	University graduate	70	50	60	14.1421
ArriveCAN	No	https://www.canada.ca/en/border-services-agency/services/arrivecan/canarrive-privacy-notice.html	16.9	Very difficult to read	University graduate	50	50	50	0
Coronapas	No	https://en.coronasmitte.dk/general-information/corona-passport/privacy-policy-for-people-travelling-with-corona-passport	16.6	Very difficult to read	University graduate	60	50	55	7.07107
EarthMed GO	No	https://medical.un.org/earthmedgo/AboutUs/privacy	16.2	Very difficult to read	University graduate	25	30	27.5	3.53553
Tawakkalna (Covid-19 KSA)	No	https://ta.sdaia.gov.sa/en/privacy-en	16.2	Very difficult to read	University graduate	30	15	22.5	10.6066
Immune	No	https://vaxcert.moh.gov.kw/tc/terms_conditions.html	15.9	Very difficult to read	University graduate	25	35	30	7.07107
Aarogya Setu	No	https://www.aarogyasetu.gov.in/privacy-policy/	15.7	Very difficult to read	University graduate	70	70	70	0
ConecteSUS	Yes	https://conectesus-paciente.saude.gov.br/perfil/politica-privacidade	15.7	Very difficult to read	University graduate	60	60	60	0
PeduliLindungi	No	https://www.pedulilindungi.id/kebijakan-privasi-data?lang=en	15.5	Very difficult to read	University graduate	55	55	55	0
Tečka	Yes	https://ockodoc.mzcr.cz/napoveda/tecka/cz/podminky-pouzivani/	15.5	Very difficult to read	University graduate	75	70	72.5	3.53553
COVID Certificate	No	https://www.bit.admin.ch/bit/en/home/documentation/covid-certificate-app.html	15.4	Difficult to read	University students	75	50	62.5	17.6777
NLVaxPass	No	https://www.gov.nl.ca/covid-19/life-during-covid-19/vaccination-record/privacy-policy/	15.3	Difficult to read	University students	55	60	57.5	3.53553
TousAntiCovid	Yes	https://bonjour.tousanticovid.gouv.fr/privacy.html	15.1	Difficult to read	University students	65	70	67.5	3.53553
LA Wallet	No	https://lawallet.com/privacy-policy/	14.9	Difficult to read	University students	35	45	40	7.07107
VaxiCode	Yes	https://covid19.quebec.ca/vaxicode/confidentialite.html	14.6	Difficult to read	University students	55	45	50	7.07107
mojelKP	Yes	https://pacjent.gov.pl/polityka-prywatnosci	14.3	Difficult to read	University students	40	35	37.5	3.53553
e-Tǝbib	No	https://a2z.az/terms/305.html	14.3	Difficult to read	University students	45	55	50	7.07107
MySejahtera	No	https://mysejahtera.malaysia.gov.my/privasi_en/	14.3	Difficult to read	University students	55	45	50	7.07107
Life Fits Home	No	https://hayatevesigar.saglik.gov.tr/gizlilik_politikasi_eng_index_V2.html	14.3	Difficult to read	University students	40	60	50	14.1421
United Airlines	No	https://www.united.com/ual/en/us/fly/privacy.html	14.1	Difficult to read	University students	65	70	67.5	3.53553
401Health	No	https://covid.ri.gov/covid-19-prevention/crush-covid-ri-app/privacy-policy	14	Difficult to read	University students	50	50	50	0
NYS Excelsior Pass Wallet	No	https://nyswallet.ny.gov/privacy	14	Difficult to read	University students	30	55	42.5	17.6777
My Bindle	No	https://www.bindlesystems.com/privacy-policy	13.8	Difficult to read	University students	65	65	65	0
CANImmunize	No	https://www.canimmunize.ca/en/privacy-policy	13.7	Difficult to read	University students	75	65	70	7.07107
myColorado	No	https://mycolorado.gov/privacy-policy	13.6	Difficult to read	University students	35	25	30	7.07107
Tarassud+	No	https://covid19.moh.gov.om/#/privacy-policy	13.6	Difficult to read	University students	30	40	35	7.07107
Service NSW	No	https://www.service.nsw.gov.au/privacy-statement	13.5	Difficult to read	University students	35	45	40	7.07107
Egypt Health Passport	No	https://healthcode.mohp.gov.eg/Privacy/	13.4	Difficult to read	University students	30	50	40	14.1421
HMH Well	No	https://www.hackensackmeridianhealth.org/en/Privacy-Policy	13.3	Difficult to read	University students	50	35	42.5	10.6066
Healthy Together	No	https://www.healthytogether.co/en/legal/privacy-policy	13.2	Difficult to read	University students	65	70	67.5	3.53553
Pak Vaccination Pass	No	https://nims.nadra.gov.pk/nims/privacyPolicy	13.1	Difficult to read	University students	30	20	25	7.07107
COVIDCert NI	No	https://covid-19.hscni.net/covid-certification-service-easy-read-privacy-information/	12.9	Difficult to read	University students	75	75	75	0
CLEAR	No	https://www.clearme.com/privacy-policy	12.7	Difficult to read	University students	70	60	65	7.07107
GHA COVID Pass	No	https://www.gibraltar.gov.gi/mygha-privacy-policy	12.7	Difficult to read	University students	50	70	60	14.1421
Navus Health	No	https://www.navushealth.com/privacy-policy/	12.5	Difficult to read	University students	55	65	60	7.07107
PC-Covid Viet Nam	Yes	https://pccovid.gov.vn/dieu-khoan-su-dung	12.3	Fairly difficult to read	16-18 years old students	25	25	25	0
DHA	No	https://www.dha.gov.ae/en/privacy-policy	12	Fairly difficult to read	16-18 years old students	50	45	47.5	3.53553
TraceTogether	No	https://www.tracetogether.gov.sg/common/privacystatement	12	Fairly difficult to read	16-18 years old students	75	45	60	21.2132
CommonHealth	No	https://www.commonhealth.org/privacy	11.8	Fairly difficult to read	16-18 years old students	75	45	60	21.2132
immuny	Yes	https://www.immuny.net/appdatenschutz/	11.7	Fairly difficult to read	16-18 years old students	70	75	72.5	3.53553
หมอพร้อม	No	https://mohpromt.moph.go.th/EN/termapplication/	11.6	Fairly difficult to read	16-18 years old students	50	50	50	0
NHS App	No	https://www.nhs.uk/nhs-app/nhs-app-legal-and-cookies/nhs-app-privacy-policy/privacy-policy/	10.9	Fairly difficult to read	16-18 years old students	55	40	47.5	10.6066
NYC COVID SAFE	No	https://www1.nyc.gov/assets/doitt/downloads/pdf/nyccovidsafe-app-privacy-policy.pdf	10.6	Fairly difficult to read	16-18 years old students	40	25	32.5	10.6066
Median			14.1			50	50	50
Q1			13			35	40	40
Q3			15.6			65	60	61.25
IQR			2.6			30	20	21.25
Average			14.5723					50.4255	7.07107
SD								14.7287
*:	Darker red cell color illustrates higher Grade Level score as worse score
**:	Darker green cell color illustrates higher Privacy Transparency Index score as better score
	Click on column header to toggle view list ascending/descending

## Sheet: t-Test
t-Test: Paired Two Sample for Means
	Variable 1	Variable 2
Mean	51.383	49.4681
Variance	280.111	236.124
Observations	47	47
Pearson Correlation	0.683383
Hypothesized Mean Difference	0
df	46
t Stat	1.02283
P(T<=t) one-tail	0.155868
t Critical one-tail	1.67866
P(T<=t) two-tail	0.311736
t Critical two-tail	2.0129

## Sheet: PTI - IA
App Name	Does the app collect personal identifiable information? Yes=0; partial*=5; no=10	Does the policy mention that the app can be used without entering identifiable information? Yes**=5; no=0	Does the privacy policy mention that the app collects identifiable information such as full name, email, phone number? Yes or (N/A***)**=5; no=0	Does the privacy policy mention that the app provides the option of a pin code, password or a log-in process to view and enter user data? Yes or N/A**=5; no=0	Does the privacy policy explicitly state which type of data is processed? Yes=15; no=0	Does the privacy policy contain a section on "how the app works" explicitly? Yes=5; no=0	Does the privacy policy state that the app/server encrypts the entered data? Yes=10; no=0	Does the privacy policy describe the process of data exchange and communication between server and phone related to user entered information? Yes=5; no=0	Does the privacy policy state that the user information is stored on the phone or device? Yes=10; no=0	Does the policy mention data retention? Yes=5; no=0	Does the privacy policy mention the GDPR? If not, does the privacy policy mention other legislative frameworks? Yes=15; no=0	Does the privacy policy state the right of users to delete entered information? Yes=5; no=0	Does the privacy policy the right of users to edit entered information? Yes=5; no=0	Privacy Transparency Index Score*
401Health	0	0	5	5	15	5	10	0	10	0	0	0	0	50
Aarogya Setu	0	0	5	5	15	5	10	5	10	5	0	5	5	70
Alhosn	0	0	0	5	15	5	0	5	0	5	0	0	0	35
ArriveCAN	0	0	5	0	0	0	10	5	0	5	15	5	5	50
CANImmunize	0	0	5	5	15	5	10	5	10	0	15	5	0	75
CLEAR	0	0	5	0	15	5	10	5	0	5	15	5	5	70
CommonHealth	10	0	0	5	15	5	10	5	0	5	15	5	0	75
ConecteSUS	0	0	5	5	15	0	10	0	0	0	15	5	5	60
Coronapas	0	0	5	0	15	5	0	5	0	5	15	5	5	60
Coronavirus UY	0	0	0	0	0	0	0	0	0	0	15	5	5	25
COVID Certificate	0	0	5	5	15	5	10	5	0	5	15	5	5	75
COVIDCert NI	0	0	5	5	15	5	10	5	0	5	15	5	5	75
DHA	0	0	5	0	15	5	10	0	0	0	15	0	0	50
e-Tǝbib	0	0	5	5	15	5	0	5	0	5	0	5	0	45
EarthMed GO	0	0	0	5	15	5	0	0	0	0	0	0	0	25
Egypt Health Passport	0	0	5	5	15	5	0	0	0	0	0	0	0	30
EHTERAZ	0	0	5	0	15	5	10	5	10	5	15	0	5	75
GHA COVID Pass	0	0	5	0	15	5	0	5	0	5	15	0	0	50
Healthy Together	0	0	5	5	15	5	0	5	0	5	15	5	5	65
HMH Well	0	0	5	5	15	0	0	5	0	0	15	0	5	50
Immune	0	0	5	5	15	0	0	0	0	0	0	0	0	25
immuny	0	0	5	5	15	0	10	5	0	5	15	5	5	70
LA Wallet	0	0	5	5	15	0	0	0	10	0	0	0	0	35
LeaveHomeSafe	0	0	5	5	15	5	0	5	10	5	15	0	5	70
Life Fits Home	0	5	5	0	15	0	0	0	0	0	15	0	0	40
mojelKP	10	0	0	0	0	0	0	0	0	5	15	5	5	40
My Bindle	0	0	5	5	15	0	10	5	0	5	15	5	0	65
myColorado	10	0	0	5	15	0	0	0	0	0	0	5	0	35
MySejahtera	0	0	5	5	15	0	10	0	0	5	15	0	0	55
Navus Health	0	0	5	5	15	0	0	0	0	5	15	5	5	55
NHS App	0	0	5	5	15	0	0	0	0	5	15	5	5	55
NLVaxPass	0	0	5	5	15	5	0	0	10	0	15	0	0	55
NYC COVID SAFE	10	0	0	5	15	0	0	0	10	0	0	0	0	40
NYS Excelsior Pass Wallet	0	0	5	0	15	0	0	5	0	0	0	5	0	30
Pak Vaccination Pass	0	0	5	0	15	0	0	0	10	0	0	0	0	30
PC-Covid Viet Nam	0	0	5	5	15	0	0	0	0	0	0	0	0	25
PeduliLindungi	0	0	5	5	15	5	10	5	0	5	0	0	5	55
Service NSW	0	0	5	0	0	0	10	0	0	0	15	0	5	35
Surokkha	0	0	5	5	15	0	10	0	0	5	0	5	0	45
Tarassud+	0	0	5	5	15	0	0	0	0	0	0	0	5	30
Tawakkalna (Covid-19 KSA)	0	0	5	5	15	0	0	0	0	5	0	0	0	30
Tečka	0	0	5	5	15	5	10	5	0	5	15	5	5	75
TousAntiCovid	0	0	5	5	15	0	0	0	10	5	15	5	5	65
TraceTogether	0	0	5	5	15	0	10	5	10	5	15	5	0	75
United Airlines	0	0	5	5	15	5	10	5	0	0	15	5	0	65
VaxiCode	0	0	5	0	15	0	0	0	10	5	15	0	5	55
หมอพร้อม	0	0	5	5	15	0	10	0	0	0	15	0	0	50
Total of Y/Yes	43	1	40	34	43	21	21	22	12	26	30	24	22
Total of N/No	4	46	7	13	4	26	26	25	35	21	17	23	25
*:	Darker green cell color signifies higher Privacy Transparency Index score.
	Click on column header to toggle view list ascending/descending

## Sheet: PTI - SG
App Name	Does the app collect personal identifiable information? Yes=0; partial*=5; no=10	Does the policy mention that the app can be used without entering identifiable information? Yes**=5; no=0	Does the privacy policy mention that the app collects identifiable information such as full name, email, phone number? Yes or (N/A***)**=5; no=0	Does the privacy policy mention that the app provides the option of a pin code, password or a log-in process to view and enter user data? Yes or N/A**=5; no=0	Does the privacy policy explicitly state which type of data is processed? Yes=15; no=0	Does the privacy policy contain a section on "how the app works" explicitly? Yes=5; no=0	Does the privacy policy state that the app/server encrypts the entered data? Yes=10; no=0	Does the privacy policy describe the process of data exchange and communication between server and phone related to user entered information? Yes=5; no=0	Does the privacy policy state that the user information is stored on the phone or device? Yes=10; no=0	Does the policy mention data retention? Yes=5; no=0	Does the privacy policy mention the GDPR? If not, does the privacy policy mention other legislative frameworks? Yes=15; no=0	Does the privacy policy state the right of users to delete entered information? Yes=5; no=0	Does the privacy policy the right of users to edit entered information? Yes=5; no=0	Privacy Transparency Index Score*
401Health	0	0	5	5	15	0	10	5	10	0	0	0	0	50
Aarogya Setu	0	0	5	5	15	5	10	5	10	5	0	5	5	70
Alhosn	0	0	0	5	0	5	0	5	10	5	0	0	0	30
ArriveCAN	10	0	5	0	0	5	10	0	10	5	0	0	5	50
CANImmunize	0	0	5	5	15	5	10	5	10	0	0	5	5	65
CLEAR	0	0	5	0	15	5	10	0	10	5	0	5	5	60
Common Health	0	0	0	5	0	5	10	5	10	5	0	5	0	45
ConecteSUS	0	0	5	0	15	5	10	0	10	0	15	0	0	60
Coronapas	0	0	5	0	15	5	0	0	10	0	15	0	0	50
Coronavirus UY	0	0	0	0	0	5	10	0	0	0	15	5	5	40
Covid Cert	10	0	0	0	0	5	10	5	0	5	15	0	0	50
COVIDCert NI	0	0	5	0	15	5	10	0	10	5	15	5	5	75
DHA	0	0	5	0	15	0	10	5	10	0	0	0	0	45
e-Tǝbib	0	0	5	0	15	5	10	0	10	5	0	5	0	55
EarthMed GO	0	0	5	5	15	5	0	0	0	0	0	0	0	30
Egypt Health Passport	0	0	5	0	15	5	10	5	10	0	0	0	0	50
EHTERAZ	0	0	0	0	15	5	10	0	0	0	15	5	5	55
GHA COVID Pass	0	0	5	5	15	5	10	5	10	0	15	0	0	70
Healthy Together	0	0	5	5	15	5	10	5	10	5	0	5	5	70
HMH Well	0	0	5	5	0	0	10	5	10	0	0	0	0	35
Immune	0	0	5	0	15	5	10	0	0	0	0	0	0	35
immuny	0	0	5	5	15	0	10	0	10	5	15	5	5	75
LA Wallet	0	0	5	0	15	5	10	0	10	0	0	0	0	45
LeaveHomeSafe	0	0	5	0	15	0	10	5	10	5	0	0	0	50
Life Fits Home	0	0	5	0	15	0	10	5	10	0	15	0	0	60
mojelKP	0	0	0	0	0	0	0	0	10	0	15	5	5	35
My Bindle	0	0	5	0	15	0	10	5	10	0	15	5	0	65
myColorado	0	0	5	0	0	0	0	5	10	0	0	5	0	25
MySejahtera	0	0	5	0	15	5	0	5	0	0	15	0	0	45
Navus Health	0	0	5	5	15	0	0	5	10	0	15	5	5	65
NHS App	0	0	0	5	0	0	10	0	10	5	0	5	5	40
NLVaxPass	0	0	5	0	15	5	10	0	10	0	15	0	0	60
NYC COVID SAFE	0	0	0	5	0	5	0	5	10	0	0	0	0	25
NYS Excelsior Pass Wallet	0	0	5	0	15	5	10	5	10	0	0	5	0	55
Pak Vaccination Pass	0	0	5	0	15	0	0	0	0	0	0	0	0	20
PC-Covid	0	0	5	0	0	5	10	5	0	0	0	0	0	25
PeduliLindungi	0	0	5	0	15	5	10	0	10	0	0	5	5	55
Service NSW	0	0	0	5	0	5	10	5	0	0	15	0	5	45
Surokkha	0	0	0	0	15	0	10	5	0	5	0	5	0	40
Tarassud+	0	0	5	0	15	5	0	0	10	0	0	0	5	40
Tawakkalna (Covid-19 KSA)	0	0	0	5	0	0	10	0	0	0	0	0	0	15
Tečka	0	0	5	5	15	0	10	0	10	0	15	5	5	70
TousAntiCovid	0	0	5	0	15	5	10	0	10	5	15	5	0	70
TraceTogether	0	0	5	5	0	5	10	5	10	0	0	5	0	45
United Airlines	0	0	5	0	15	0	10	5	10	0	15	5	5	70
VaxiCode	0	0	5	0	15	5	0	0	10	5	0	0	5	45
หมอพร้อม	0	0	5	0	15	5	10	0	0	0	15	0	0	50
Total of Y/Yes	45	0	36	17	33	31	36	24	35	15	19	22	18
Total of N/No	2	47	11	30	14	16	11	23	12	32	28	25	29
*:	Darker green cell color signifies higher Privacy Transparency Index score.
	Click on column header to toggle view list ascending/descending

## Sheet: Observing agreements
	Does the app collect personal identifiable information? Yes=0; partial*=5; no=10			Does the policy mention that the app can be used without entering identifiable information? Yes**=5; no=0			Does the privacy policy mention that the app collects identifiable information such as full name, email, phone number? Yes or (N/A***)**=5; no=0			Does the privacy policy mention that the app provides the option of a pin code, password or a log-in process to view and enter user data? Yes or N/A**=5; no=0			Does the privacy policy explicitly state which type of data is processed? Yes=15; no=0			Does the privacy policy contain a section on "how the app works" explicitly? Yes=5; no=0			Does the privacy policy state that the app/server encrypts the entered data? Yes=10; no=0			Does the privacy policy describe the process of data exchange and communication between server and phone related to user entered information? Yes=5; no=0			Does the privacy policy state that the user information is stored on the phone or device? Yes=10; no=0			Does the policy mention data retention? Yes=5; no=0			Does the privacy policy mention the GDPR? If not, does the privacy policy mention other legislative frameworks? Yes=15; no=0			Does the privacy policy state the right of users to delete entered information? Yes=5; no=0			Does the privacy policy the right of users to edit entered information? Yes=5; no=0
App Name	IA	SG	Observed Agreement	IA	SG	Observed Agreement	IA	SG	Observed Agreement	IA	SG	Observed Agreement	IA	SG	Observed Agreement	IA	SG	Observed Agreement	IA	SG	Observed Agreement	IA	SG	Observed Agreement	IA	SG	Observed Agreement	IA	SG	Observed Agreement	IA	SG	Observed Agreement	IA	SG	Observed Agreement	IA	SG	Observed Agreement	Privacy Transparency Index Score*
401Health	0	0	1	0	0	1	5	5	1	5	5	1	15	15	1	5	0	0	10	10	1	0	5	0	10	10	1	0	0	1	0	0	1	0	0	1	0	0	1	50
Aarogya Setu	0	0	1	0	0	1	5	5	1	5	5	1	15	15	1	5	5	1	10	10	1	5	5	1	10	10	1	5	5	1	0	0	1	5	5	1	5	5	1	70
Alhosn	0	0	1	0	0	1	0	0	1	5	5	1	15	0	0	5	5	1	0	0	1	5	5	1	0	10	0	5	5	1	0	0	1	0	0	1	0	0	1	35
ArriveCAN	0	10	0	0	0	1	5	5	1	0	0	1	0	0	1	0	5	0	10	10	1	5	0	0	0	10	0	5	5	1	15	0	0	5	0	0	5	5	1	50
CANImmunize	0	0	1	0	0	1	5	5	1	5	5	1	15	15	1	5	5	1	10	10	1	5	5	1	10	10	1	0	0	1	15	0	0	5	5	1	0	5	0	75
CLEAR	0	0	1	0	0	1	5	5	1	0	0	1	15	15	1	5	5	1	10	10	1	5	0	0	0	10	0	5	5	1	15	0	0	5	5	1	5	5	1	70
CommonHealth	10	0	0	0	0	1	0	0	1	5	5	1	15	0	0	5	5	1	10	10	1	5	5	1	0	10	0	5	5	1	15	0	0	5	5	1	0	0	1	75
ConecteSUS	0	0	1	0	0	1	5	5	1	5	0	0	15	15	1	0	5	0	10	10	1	0	0	1	0	10	0	0	0	1	15	15	1	5	0	0	5	0	0	60
Coronapas	0	0	1	0	0	1	5	5	1	0	0	1	15	15	1	5	5	1	0	0	1	5	0	0	0	10	0	5	0	0	15	15	1	5	0	0	5	0	0	60
Coronavirus UY	0	0	1	0	0	1	0	0	1	0	0	1	0	0	1	0	5	0	0	10	0	0	0	1	0	0	1	0	0	1	15	15	1	5	5	1	5	5	1	25
COVID Certificate	0	10	0	0	0	1	5	0	0	5	0	0	15	0	0	5	5	1	10	10	1	5	5	1	0	0	1	5	5	1	15	15	1	5	0	0	5	0	0	75
COVIDCert NI	0	0	1	0	0	1	5	5	1	5	0	0	15	15	1	5	5	1	10	10	1	5	0	0	0	10	0	5	5	1	15	15	1	5	5	1	5	5	1	75
DHA	0	0	1	0	0	1	5	5	1	0	0	1	15	15	1	5	0	0	10	10	1	0	5	0	0	10	0	0	0	1	15	0	0	0	0	1	0	0	1	50
e-Tǝbib	0	0	1	0	0	1	5	5	1	5	0	0	15	15	1	5	5	1	0	10	0	5	0	0	0	10	0	5	5	1	0	0	1	5	5	1	0	0	1	45
EarthMed GO	0	0	1	0	0	1	0	5	0	5	5	1	15	15	1	5	5	1	0	0	1	0	0	1	0	0	1	0	0	1	0	0	1	0	0	1	0	0	1	25
Egypt Health Passport	0	0	1	0	0	1	5	5	1	5	0	0	15	15	1	5	5	1	0	10	0	0	5	0	0	10	0	0	0	1	0	0	1	0	0	1	0	0	1	30
EHTERAZ	0	0	1	0	0	1	5	0	0	0	0	1	15	15	1	5	5	1	10	10	1	5	0	0	10	0	0	5	0	0	15	15	1	0	5	0	5	5	1	75
GHA COVID Pass	0	0	1	0	0	1	5	5	1	0	5	0	15	15	1	5	5	1	0	10	0	5	5	1	0	10	0	5	0	0	15	15	1	0	0	1	0	0	1	50
Healthy Together	0	0	1	0	0	1	5	5	1	5	5	1	15	15	1	5	5	1	0	10	0	5	5	1	0	10	0	5	5	1	15	0	0	5	5	1	5	5	1	65
HMH Well	0	0	1	0	0	1	5	5	1	5	5	1	15	0	0	0	0	1	0	10	0	5	5	1	0	10	0	0	0	1	15	0	0	0	0	1	5	0	0	50
Immune	0	0	1	0	0	1	5	5	1	5	0	0	15	15	1	0	5	0	0	10	0	0	0	1	0	0	1	0	0	1	0	0	1	0	0	1	0	0	1	25
immuny	0	0	1	0	0	1	5	5	1	5	5	1	15	15	1	0	0	1	10	10	1	5	0	0	0	10	0	5	5	1	15	15	1	5	5	1	5	5	1	70
LA Wallet	0	0	1	0	0	1	5	5	1	5	0	0	15	15	1	0	5	0	0	10	0	0	0	1	10	10	1	0	0	1	0	0	1	0	0	1	0	0	1	35
LeaveHomeSafe	0	0	1	0	0	1	5	5	1	5	0	0	15	15	1	5	0	0	0	10	0	5	5	1	10	10	1	5	5	1	15	0	0	0	0	1	5	0	0	70
Life Fits Home	0	0	1	5	0	0	5	5	1	0	0	1	15	15	1	0	0	1	0	10	0	0	5	0	0	10	0	0	0	1	15	15	1	0	0	1	0	0	1	40
mojelKP	10	0	0	0	0	1	0	0	1	0	0	1	0	0	1	0	0	1	0	0	1	0	0	1	0	10	0	5	0	0	15	15	1	5	5	1	5	5	1	40
My Bindle	0	0	1	0	0	1	5	5	1	5	0	0	15	15	1	0	0	1	10	10	1	5	5	1	0	10	0	5	0	0	15	15	1	5	5	1	0	0	1	65
myColorado	10	0	0	0	0	1	0	5	0	5	0	0	15	0	0	0	0	1	0	0	1	0	5	0	0	10	0	0	0	1	0	0	1	5	5	1	0	0	1	35
MySejahtera	0	0	1	0	0	1	5	5	1	5	0	0	15	15	1	0	5	0	10	0	0	0	5	0	0	0	1	5	0	0	15	15	1	0	0	1	0	0	1	55
Navus Health	0	0	1	0	0	1	5	5	1	5	5	1	15	15	1	0	0	1	0	0	1	0	5	0	0	10	0	5	0	0	15	15	1	5	5	1	5	5	1	55
NHS App	0	0	1	0	0	1	5	0	0	5	5	1	15	0	0	0	0	1	0	10	0	0	0	1	0	10	0	5	5	1	15	0	0	5	5	1	5	5	1	55
NLVaxPass	0	0	1	0	0	1	5	5	1	5	0	0	15	15	1	5	5	1	0	10	0	0	0	1	10	10	1	0	0	1	15	15	1	0	0	1	0	0	1	55
NYC COVID SAFE	10	0	0	0	0	1	0	0	1	5	5	1	15	0	0	0	5	0	0	0	1	0	5	0	10	10	1	0	0	1	0	0	1	0	0	1	0	0	1	40
NYS Excelsior Pass Wallet	0	0	1	0	0	1	5	5	1	0	0	1	15	15	1	0	5	0	0	10	0	5	5	1	0	10	0	0	0	1	0	0	1	5	5	1	0	0	1	30
Pak Vaccination Pass	0	0	1	0	0	1	5	5	1	0	0	1	15	15	1	0	0	1	0	0	1	0	0	1	10	0	0	0	0	1	0	0	1	0	0	1	0	0	1	30
PC-Covid Viet Nam	0	0	1	0	0	1	5	5	1	5	0	0	15	0	0	0	5	0	0	10	0	0	5	0	0	0	1	0	0	1	0	0	1	0	0	1	0	0	1	25
PeduliLindungi	0	0	1	0	0	1	5	5	1	5	0	0	15	15	1	5	5	1	10	10	1	5	0	0	0	10	0	5	0	0	0	0	1	0	5	0	5	5	1	55
Service NSW	0	0	1	0	0	1	5	0	0	0	5	0	0	0	1	0	5	0	10	10	1	0	5	0	0	0	1	0	0	1	15	15	1	0	0	1	5	5	1	35
Surokkha	0	0	1	0	0	1	5	0	0	5	0	0	15	15	1	0	0	1	10	10	1	0	5	0	0	0	1	5	5	1	0	0	1	5	5	1	0	0	1	45
Tarassud+	0	0	1	0	0	1	5	5	1	5	0	0	15	15	1	0	5	0	0	0	1	0	0	1	0	10	0	0	0	1	0	0	1	0	0	1	5	5	1	30
Tawakkalna (Covid-19 KSA)	0	0	1	0	0	1	5	0	0	5	5	1	15	0	0	0	0	1	0	10	0	0	0	1	0	0	1	5	0	0	0	0	1	0	0	1	0	0	1	30
Tečka	0	0	1	0	0	1	5	5	1	5	5	1	15	15	1	5	0	0	10	10	1	5	0	0	0	10	0	5	0	0	15	15	1	5	5	1	5	5	1	75
TousAntiCovid	0	0	1	0	0	1	5	5	1	5	0	0	15	15	1	0	5	0	0	10	0	0	0	1	10	10	1	5	5	1	15	15	1	5	5	1	5	0	0	65
TraceTogether	0	0	1	0	0	1	5	5	1	5	5	1	15	0	0	0	5	0	10	10	1	5	5	1	10	10	1	5	0	0	15	0	0	5	5	1	0	0	1	75
United Airlines	0	0	1	0	0	1	5	5	1	5	0	0	15	15	1	5	0	0	10	10	1	5	5	1	0	10	0	0	0	1	15	15	1	5	5	1	0	5	0	65
VaxiCode	0	0	1	0	0	1	5	5	1	0	0	1	15	15	1	0	5	0	0	0	1	0	0	1	10	10	1	5	5	1	15	0	0	0	0	1	5	5	1	55
หมอพร้อม	0	0	1	0	0	1	5	5	1	5	0	0	15	15	1	0	5	0	10	10	1	0	0	1	0	0	1	0	0	1	15	15	1	0	0	1	0	0	1	50
observed agreement			41			46			39			26			37			27			30			27			20			36			36			41			39
percent agreement			0.87234			0.978723			0.829787			0.553191			0.787234			0.574468			0.638298			0.574468			0.425532			0.765957			0.765957			0.87234			0.829787

## Sheet: PTI - average
Number	Checklist	Yes	No	Observed Agreement	Percent agreement
2	Does the policy mention that the app can be used without entering identifiable information? Yes**=5; no=0	0.5	46.5	46	0.978723
1	Does the app collect personal identifiable information? Yes=0; partial*=5; no=10	44	3	41	0.87234
12	Does the privacy policy state the right of users to delete entered information? Yes=5; no=0	23	24	41	0.87234
13	Does the privacy policy the right of users to edit entered information? Yes=5; no=0	20	27	39	0.829787
3	Does the privacy policy mention that the app collects identifiable information such as full name, email, phone number? Yes or (N/A***)**=5; no=0	38	9	39	0.829787
5	Does the privacy policy explicitly state which type of data is processed? Yes=15; no=0	38	9	37	0.787234
10	Does the policy mention data retention? Yes=5; no=0	20.5	26.5	36	0.765957
11	Does the privacy policy mention the GDPR? If not, does the privacy policy mention other legislative frameworks? Yes=15; no=0	24.5	22.5	36	0.765957
7	Does the privacy policy state that the app/server encrypts the entered data? Yes=10; no=0	28.5	18.5	30	0.638298
8	Does the privacy policy describe the process of data exchange and communication between server and phone related to user entered information? Yes=5; no=0	23	24	27	0.574468
6	Does the privacy policy contain a section on "how the app works" explicitly? Yes=5; no=0	26	21	27	0.574468
4	Does the privacy policy mention that the app provides the option of a pin code, password or a log-in process to view and enter user data? Yes or N/A**=5; no=0	25.5	21.5	26	0.553191
9	Does the privacy policy state that the user information is stored on the phone or device? Yes=10; no=0	23.5	23.5	20	0.425532
	Average			34.2308	0.728314
	*:			Darker red cell color illustrates lower percent agreement, darker green illustrates higher percent agreement

## Sheet: GooglePlay
Timestamp	Date of data extraction	Number of installs	Reviews	Number of reviews	Current version	Updated	Requires Android	Offered by	Permissions	AppName ID	Country
2020-09-22 11:42:49	2020-09-22	100000	2.8	739	1.0.3	2020-03-23	4.1 and up	Algerian Ministry of Startups	This app has access to locations, phone, photos/media/files, storage, and device ID & call information	Coronavirus Algérie	Algeria
2020-09-22 11:47:39	2020-09-22	1000000	2.7	13170	1.11.0	2020-09-10	5.0 and up	Australian Department of Health	This app has access to: Location: Precise location (GPS and network-based) and approximate location (network-based) Other: Receive data from Internet Access Bluetooth settings Full network access Prevent device from sleeping Pair with Bluetooth devices Run at startup View network connections	COVIDSafe	Australia
2020-09-22 12:10:48	2020-09-22	100000	3.4	2930	2.0.4.1060-QA_248	2020-07-08	6.0 and up	Österreichisches Rotes Kreuz	This app has access to: View network connections Pair with Bluetooth devices Full network access Run at startup Prevent device from sleeping	Stopp Corona	Austria
2020-09-22 12:30:56	2020-09-22	100000	3.6	2052	1.7.6	2020-09-09	5.0 and up	Data Processing Center	This app has access to: Wi-Fi connection information (view Wi-Fi connections) Location: approximate location (network-based) and precise location (GPS and network-based) Phone (directly call phone numbers) Camera (take pictures and videos) Other: Receive data from Internet Access Bluetooth settings Pair with Bluetooth devices View network connections Full network access Prevent device from sleepi…	e-Tabib	Azerbaijan
2020-09-22 12:38:13	2020-09-22	100000	4.4	3998	0.2.3	2020-09-14	4.4 and up	Information & eGovernment Authority	This app has access to: Device & app history (retrieve running apps) Calendar: Read calendar events plus confidential information Add or modify calendar events and send email to guests without owners' knowledge Location: Approximate location (network-based) and precise location (GPS and network-based) Access extra location provider commands Photos / Media / Files: Read the contents of your USB st…	BeAware Bahrain	Bahrain
2020-09-22 12:45:33	2020-09-22	500000	3.4	4199	1.0.14	2020-07-21	5.0 and up	Mobile game & application project, ICT Division	This app has access to: Location: precise location (GPS and network-based) Phone: read phone status and identity Device ID & call information: read phone status and identity Other: View network connections Pair with Bluetooth devices Access Bluetooth settings Full network access Run at startup Prevent device from sleeping	Corona Tracer BD	Bangladesh
2020-09-22 12:49:01	2020-09-22	100000	4.2	1147	2	2020-07-21	4.1 and up	G2C Bhutan Apps	Wi-Fi connection information: view Wi-Fi connections Camera: take pictures and videos Storage: Read the contents of your USB storage Modify or delete the contents of your USB storage Device ID & call information: Read phone status and identity Phone: Read phone status and identity Photos / Media / Files: Read the contents of your USB storage Modify or delete the contents of your USB storage Other…	Druk Trace	Bhutan
2020-09-22 12:53:38	2020-09-22	5000000	3.5	17039	2.1.6	2020-08-28	5.0 and up	Governo do Brasil	This app has access to: Receive data from Internet View network connections Pair with Bluetooth devices Full network access Run at startup Control vibration Prevent device from sleeping	Coronavirus SUS	Brazil
2020-09-22 12:59:29	2020-09-22	100000	3.6	1984	2.7.2	2020-09-17	5.0 and up	MAMBALABS	This app has access to: Device & app history: retrieve running apps Location: Approximate location (network-based) Precise location (GPS and network-based) Access extra location provider commands Wi-Fi connection information: view Wi-Fi connections Other: Receive data from Internet View network connections Pair with Bluetooth devices Access Bluetooth settings Full network access Run at startup Pr…	Dycovid - Dynamic Contact Tracing	Brazil
2020-09-23 09:57:49	2020-09-23	10000	3.5	1023	1.0.3	2020-05-27	5.0 and up	government.bg	This app has access to: Location: Precise location (GPS and network-based) Other: Receive data from Internet View network connections Full network access Run at startup Prevent device from sleeping	ViruSafe	Bulgaria
2020-09-23 10:11:58	2020-09-23	50000	2.6	546	1.2.0	2020-06-17	8.0 and up	Government of the Province of Alberta	This app has access to: Location: precise location (GPS and network-based) Wi-Fi connection information: view Wi-Fi connections Other: Access Bluetooth settings Pair with Bluetooth devices Full network access Run at startup	ABTraceTogether	Canada- Alberta
2020-09-23 10:16:03	2020-09-23	500000	3.5	3871	1.0.8	2020-09-22	6.0 and up	Health Canada | Santé Canada	This app has access to: Device & app history: retrieve running apps Wi-Fi connection information: view Wi-Fi connections Other: View network connections Pair with Bluetooth devices Full network access Run at startup Prevent device from sleeping	COVID Alert	Canada
2020-09-23 10:21:18	2020-09-23	10000000	3.9	65528	1.2.55	2020-09-02	5.1 and up	INS.GOV	This app has access to: Contacts: read your contacts Device ID & call information: read phone status and identity Location: precise location (GPS and network-based) and approximate location (network-based) Phone: Read phone status and identity Directly call phone numbers Other: receive data from Internet set an alarm full network access run at startup view network connections prevent device from …	CoronApp - Colombia	Colombia
2020-09-23 13:39:54	2020-09-23	10000	4.1	414	1.1.0	2020-09-11	6.0 and up	Ministarstvo zdravstva	This app has access to: receive data from Internet pair with Bluetooth devices run at startup view network connections full network access prevent device from sleeping	Stop COVID-19	Croatia
2020-09-23 13:46:35	2020-09-23	1000	4.2	13	2.0.2	2020-06-11	5.0 and up	RISE Research Centre of Excellence	This app has access to: Storage: Read the contents of your USB storage Modify or delete the contents of your USB storage Location: Precise location (GPS and network-based) Access extra location provider commands Approximate location (network-based) Photos / Media / Files: Read the contents of your USB storage Modify or delete the contents of your USB storage Wi-Fi connection information: View Wi-…	CovTracer	Cyprus
2020-09-23 13:51:03	2020-09-23	100000	3.9	3282	2.1.568	2020-09-20	6.0 and up	Ministerstvo zdravotnictví České republiky	This app has access to: Other: receive data from Internet view network connections full network access prevent device from sleeping pair with Bluetooth devices run at startup	eRouška - Part of Smart Quarantine	Czech Republic
2020-09-23 13:56:28	2020-09-23	100000	3.6	989	1.1	2020-08-14	6.0 and up	Sundheds- og Ældreministeriet	This app has access to: Other: view network connections pair with Bluetooth devices full network access run at startup prevent device from sleeping	Smittestop	Denmark
2020-09-23 14:04:43	2020-09-23	50000	3.6	369	1.0.2	2020-09-17	6.0 and up	TEHIK	This app has access to: Other: view network connections pair with Bluetooth devices full network access run at startup prevent device from sleeping	Hoia	Estonia
2020-09-23 21:06:15	2020-09-23	50000	3.7	214	1.0.47	2020-09-12	5.1 and up	Government of the Republic of Fiji	Location: precise location (GPS and network-based) Other: receive data from Internet pair with Bluetooth devices run at startup view network connections prevent device from sleeping access Bluetooth settings control vibration full network access	careFIJI	Fiji
2020-09-23 21:14:07	2020-09-23	1000000	3.2	3466	1.0.1+aba6841	2020-09-11	6.0 and up	Terveyden ja hyvinvoinnin laitos	This app has access to: Pair with Bluetooth devices View network connections Full network access Prevent device from sleeping Run at startup	Koronavilkku	Finland
2020-09-23 21:19:12	2020-09-23	1000000	2.8	9740	1.1.4	2020-09-15	5.0 and up	Gouvernement	This app has access to: Location: Precise location (GPS and network-based) Approximate location (network-based) Camera: take pictures and videos Wi-Fi connection information: view Wi-Fi connections Other: Receive data from Internet Run at startup Full network access Prevent device from sleeping View network connections Access Bluetooth settings Pair with Bluetooth devices	StopCovid France	France
2020-09-23 21:26:07	2020-09-23	100000	3.8	665	1.0.467	2020-04-17	5.0 and up	Ministry of IDPs, Labour, Health, Social Affairs	This app has access to: Wi-Fi connection information: view Wi-Fi connections Location: Precise location (GPS and network-based) Approximate location (network-based) Other: receive data from Internet control Near Field Communication pair with Bluetooth devices view network connections connect and disconnect from Wi-Fi full network access access Bluetooth settings control vibration prevent device f…	Stop Covid	Georgia
2020-09-23 21:29:18	2020-09-23	5000000	3	79259	1.3.0	2020-09-02	6.0 and up	Robert Koch-Institut	This app has access to: Camera: take pictures and videos Other: run at startup full network access prevent device from sleeping view network connections pair with Bluetooth devices	Corona-Warn-App	Germany
2020-09-23 21:34:01	2020-09-23	5000	3.5	22	1.0.5	2020-07-27	5.0 and up	Ministry of Communications	Device & app history: retrieve running apps Location: Approximate location (network-based) Precise location (GPS and network-based) Access extra location provider commands Photos/Media/Files: Read the contents of your USB storage Modify or delete the contents of your USB storage Storage: Read the contents of your USB storage Modify or delete the contents of your USB storage Camera: Take pictures …	GH COVID-19 Tracker	Ghana
2020-09-23 21:38:22	2020-09-23	10000	3.1	46	1.0.1.18	2020-06-25	6.0 and up	Gibraltar Health Authority	This app has access to: Wi-Fi connection information: view Wi-Fi connections Other: View network connections Pair with Bluetooth devices Full network access	Beat Covid Gibraltar	Gibraltar
2020-09-23 21:42:24	2020-09-23	50000	3.1	300	1.0.0	2020-05-15	5.0 and up	Kormányzati Informatikai Fejlesztési Ügynökség	This app has access to: Location: Approximate location (network-based) Precise location (GPS and network-based) Other: receive data from Internet view network connections pair with Bluetooth devices access Bluetooth settings full network access run at startup prevent device from sleeping	VírusRadar	Hungary
2020-09-24 08:26:06	2020-09-24	100000	2.9	350	2.1.2	2020-07-19	5.0 and up	Embætti landlæknis	This app has access to: Phone: read phone status and identity Device ID & call information: read phone status and identity Photos / Media / Files: Read the contents of your USB storage Modify or delete the contents of your USB storage Location: Approximate location (network-based) Precise location (GPS and network-based) Access extra location provider commands Storage: Read the contents of your U…	Rakning C-19	Iceland
2020-09-24 15:28:41	2020-09-24	500000	2.2	2091	1.07	2020-06-29	4.2 and up	KSRSAC KGIS	This app has access to: Location: approximate location (network-based) precise location (GPS and network-based) Phone: read phone status and identity Photos/Media/Files: read the contents of your USB storage modify or delete the contents of your USB storage Storage: read the contents of your USB storage modify or delete the contents of your USB storage Wi-Fi connection information: view Wi-Fi con…	Corona Watch	India
2020-09-24 18:29:01	2020-09-24	100000	2.7	203	1.7.1	2020-05-08	4.3 and up	Maharashtra State Innovation Society	This app has access to: Identity: find accounts on the device add or remove accounts Contacts: find accounts on the device read your contacts Location: approximate location (network-based) precise location (GPS and network-based) Phone: directly call phone numbers Photos / Media / Files: read the contents of your USB storage modify or delete the contents of your USB storage Storage: read the cont…	Mahakavach	India
2020-09-24 18:35:45	2020-09-24	1000000	3.9	31701	1.3.22	2020-09-08	4.4 and up	Government of Punjab	This app has access to: Location: approximate location (network-based) precise location (GPS and network-based) Photos/Media/Files: read the contents of your USB storage modify or delete the contents of your USB storage Storage: read the contents of your USB storage modify or delete the contents of your USB storage Camera: take pictures and videos Other: receive data from Internet view network co…	COVA Punjab	India
2020-09-24 18:41:27	2020-09-24	100000	3.2	312	1.2.6	2020-09-02	4.1 and up	Surat Municipal Corporation (SMC)	This app has access to: Identity: find accounts on the device Contacts: find accounts on the device Location: approximate location (network-based) precise location (GPS and network-based) Phone: read phone status and identity Photos / Media / Files: read the contents of your USB storage modify or delete the contents of your USB storage Storage: read the contents of your USB storage modify or dele…	SMC COVID-19 Tracker	India
2020-09-24 18:44:41	2020-09-24	100000000	4.3	1373890	1.4.1	2020-07-08	5.0 and up	NIC eGov Mobile Apps	This app has access to: Location: approximate location (network-based) precise location (GPS and network-based) Camera: take pictures and videos Other: receive data from Internet view network connections pair with Bluetooth devices access Bluetooth settings full network access run at startup prevent device from sleeping	Aarogya Setu	India
2020-09-24 18:47:41	2020-09-24	1000000	3.9	38442	2.3.0	2020-07-21	5.0 and up	Kementerian Kominfo	This app has access to: Location: precise location (GPS and network-based) approximate location (network-based) Wi-Fi connection information: view Wi-Fi connections Camera: take pictures and videos Storage: read the contents of your USB storage modify or delete the contents of your USB storage Photos/Media/Files: read the contents of your USB storage modify or delete the contents of your USB stor…	PeduliLindungi	Indonesia
2020-09-24 18:52:21	2020-09-24	500000	3.9	2614	1.0.2.52	2020-08-26	6.0 and up	Health Service Executive (HSE)	This app has access to: Wi-Fi connection information: view Wi-Fi connections Other: view network connections full network access pair with Bluetooth devices run at startup	COVID Tracker Ireland	Ireland
2020-09-24 18:59:59	2020-09-24	1000000	3.3	4886	2.2.14	2020-08-27	5.0 and up	משרד הבריאות Gov	This app has access to: Device & app history: retrieve running apps Location: approximate location (network-based) precise location (GPS and network-based) access extra location provider commands Wi-Fi connection information: view Wi-Fi connections Other: receive data from Internet view network connections pair with Bluetooth devices access Bluetooth settings full network access run at startup dr…	HaMagen	Israel
2020-09-24 23:23:22	2020-09-25	1000000	3.6	31024	1.5.0	2020-09-21	6.0 and up	Ministero della Salute	This app has access to: Other: pair with Bluetooth devices view network connections full network access prevent device from sleeping run at startup	Immuni	Italy
2020-09-24 23:28:39	2020-09-25	50000	3.9	801	5.1	2020-07-17	5.0 and up	Softmining Srl	This app has access to: Location: precise location (GPS and network-based) approximate location (network-based) Phone: read phone status and identity Device ID & call information: read phone status and identity Storage: modify or delete the contents of your USB storage read the contents of your USB storage Wi-Fi connection information: view Wi-Fi connections Photos / Media / Files: modify or dele…	SM_Covid19	Italy
2020-09-24 23:34:36	2020-09-25	5000000	3.1	8739	1.1.3	2020-09-08	6.0 and up	厚生労働省健康局	This app has access to: Other: view network connections full network access prevent device from sleeping pair with Bluetooth devices run at startup	COCOA - COVID-19 Contact App	Japan
2020-09-24 23:36:11	2020-09-25	1000000	3.5	4494	1	2020-05-24	5.0 and up	Jordan eGov Program	This app has access to: Wi-Fi connection information: view Wi-Fi connections Location: approximate location (network-based) precise location (GPS and network-based) access extra location provider commands Device & app history: retrieve running apps Photos / Media / Files: modify or delete the contents of your USB storage read the contents of your USB storage Storage: modify or delete the contents…	AMAN	Jordan
2020-09-24 23:39:32	2020-09-25	1000	2	18	v0.4.38	2020-04-28	4.4 and up	Medic Mobile, Inc.	This app has access to: Location: approximate location (network-based) precise location (GPS and network-based) Photos / Media / Files: modify or delete the contents of your USB storage read the contents of your USB storage Storage: modify or delete the contents of your USB storage read the contents of your USB storage Other: install shortcuts control vibration view network connections full netwo…	Kenya Covid-19 Tracker	Kenya
2020-09-24 23:41:23	2020-09-25	100000	3.7	635	Varies with device	2020-06-21	4.4 and up	Kuwait Central Agency for Information Technology	This app has access to: Device & app history: retrieve running apps Storage: read the contents of your USB storage modify or delete the contents of your USB storage Camera: take pictures and videos Location: approximate location (network-based) precise location (GPS and network-based) access extra location provider commands Microphone: record audio Device ID & call information: read phone status …	Shlonik	Kuwait
2020-09-24 23:44:21	2020-09-25	100000	3.2	857	1.0.52	2020-08-13	6.0 and up	SPKC	This app has access to: Other: receive data from Internet pair with Bluetooth devices view network connections full network access prevent device from sleeping run at startup	Apturi Covid Latvia	Latvia
2020-09-24 23:48:28	2020-09-25	10000	3.9	46	1.0.2	2020-08-24	5.0 and up	Lebanese Ministry of Public Health	This app has access to: Location: precise location (GPS and network-based) Photos / Media / Files: read the contents of your USB storage modify or delete the contents of your USB storage Storage: read the contents of your USB storage modify or delete the contents of your USB storage Other: receive data from Internet view network connections pair with Bluetooth devices access Bluetooth settings fu…	Ma3an - Together Against Corona	Lebanon
2020-09-24 23:51:59	2020-09-25	1000000	3.5	7353	2.6.73	2020-05-22	5.0 and up	MALAYSIAN COMMUNICATIONS AND MULTIMEDIA COMMISSION	This app has access to: Phone: read phone status and identity Device ID & call information: read phone status and identity Wi-Fi connection information: view Wi-Fi connections Camera: take pictures and videos Photos / Media / Files: read the contents of your USB storage modify or delete the contents of your USB storage Location: approximate location (network-based) precise location (GPS and netwo…	GERAK MALAYSIA	Malaysia
2020-09-25 09:32:26	2020-09-25	50000	3.1	134	2.1.0	2020-09-17	5.1 and up	Sarawak Government	This app has access to: Location: approximate location (network-based) precise location (GPS and network-based) Camera: take pictures and videos Other: receive data from Internet view network connections pair with Bluetooth devices access Bluetooth settings full network access run at startup control vibration prevent device from sleeping	COVIDTrace	Malaysia-Sarawak
2020-09-25 09:35:22	2020-09-25	100000	3.8	817	1.0.30	2020-04-26	6.0 and up	GOVERNMENT OF MALAYSIA	This app has access to: Device & app history: retrieve running apps Location: approximate location (network-based) precise location (GPS and network-based) Photos / Media / Files: read the contents of your USB storage modify or delete the contents of your USB storage Storage: read the contents of your USB storage modify or delete the contents of your USB storage Other: receive data from Internet …	MyTrace	Malaysia
2020-09-25 09:38:13	2020-09-25	10000	4.4	102	1.0.2	2020-04-28	5.1 and up	HPA Maldives	This app has access to: Location: precise location (GPS and network-based) Other: receive data from Internet view network connections pair with Bluetooth devices access Bluetooth settings full network access run at startup prevent device from sleeping	TraceEkee	Maldives
2020-09-25 10:06:27	2020-09-25	10000	4.6	86	1.2.8	2020-09-03	6.0 and up	Government of Malta	This app has access to: Other: view network connections pair with Bluetooth devices full network access run at startup prevent device from sleeping	COVID Alert Malta	Malta
2020-09-25 10:10:10	2020-09-25	5000	2.8	31	1.6	2020-04-29	5.0 and up	Gobierno del Estado de Jalisco	This app has access to: Location: approximate location (network-based) Other: receive data from Internet view network connections full network access prevent device from sleeping	Plan Jalisco Covid-19	Mexico
2020-09-25 10:14:26	2020-09-25	500000	3.5	3200	Varies with device	2020-05-26	Varies with device	Secretaría de Salud MX	This app has access to: Camera: take pictures and videos Contacts: read your contacts Photos / Media / Files: read the contents of your USB storage modify or delete the contents of your USB storage Storage: read the contents of your USB storage modify or delete the contents of your USB storage Location: precise location (GPS and network-based) approximate location (network-based) Other: receive d…	COVID-19MX	Mexico
2020-09-25 10:17:54	2020-09-25	50000	3.3	234	1.1.2	2020-04-08	6.0 and up	LUMC Leiden	This app has access to: Phone: read phone status and identity Photos/Media/Files: read the contents of your USB storage modify or delete the contents of your USB storage Storage: read the contents of your USB storage modify or delete the contents of your USB storage Device ID & call information: read phone status and identity Other: receive data from Internet view network connections full network…	COVID Radar	Mexico
2020-09-25 10:23:00	2020-09-25	1000000	4.3	12806	1.2.1	2020-08-12	5.0 and up	Ministère de l'Intérieur du Maroc	This app has access to: Location: precise location (GPS and network-based) Other: receive data from Internet access Bluetooth settings run at startup full network access prevent device from sleeping view network connections pair with Bluetooth devices	Wiqaytna	Morocco
2020-09-25 10:28:45	2020-09-25	500	3	7	3.0.3	2020-05-24	5.0 and up	Pradesh 5	This app has access to: Location: approximate location (network-based) precise location (GPS and network-based) Wi-Fi connection information: view Wi-Fi connections Other: view network connections pair with Bluetooth devices access Bluetooth settings full network access run at startup prevent device from sleeping	Nepal Trace	Nepal
2020-09-25 10:30:38	2020-09-25	500000	2.9	2289	1.0.2	2020-09-11	6.0 and up	Rijksoverheid	This app has access to: Other: view network connections pair with Bluetooth devices full network access run at startup prevent device from sleeping	CoronaMelder	Netherlands
2020-09-25 10:34:29	2020-09-25	1000000	3.6	3698	1.5.0	2020-09-21	6.0 and up	Ministry of Health NZ	This app has access to: Camera: take pictures and videos Other: receive data from Internet view network connections full network access control vibration prevent device from sleeping	NZ COVID Tracer	New Zealand
2020-09-25 10:39:23	2020-09-25	50000	3.3	307	1.1.0	2020-05-07	5.0 and up	Ministry of Information Society and Administration	This app has access to: Location: approximate location (network-based) precise location (GPS and network-based) Other: receive data from Internet view network connections pair with Bluetooth devices access Bluetooth settings full network access prevent device from sleeping	StopKorona!	North Macedonia
2020-09-25 10:46:34	2020-09-25	100000	2.2	2138	1.3.0	2020-06-08	5.0 and up	Folkehelseinstituttet	This app has access to: Location: precise location (GPS and network-based) Other: access Bluetooth settings pair with Bluetooth devices view network connections full network access prevent device from sleeping run at startup	Smittestopp	Norway
2020-09-25 10:49:49	2020-09-25	5000	3.6	39	1.1.2	2020-09-23	7.0 and up	Ministry of Health Apps	This app has access to: Location: approximate location (network-based) precise location (GPS and network-based) access extra location provider commands Phone: read phone status and identity Photos / Media / Files: read the contents of your USB storage modify or delete the contents of your USB storage Storage: read the contents of your USB storage modify or delete the contents of your USB storage …	HMushrif	Oman
2020-09-25 10:53:40	2020-09-25	100000	3.3	713	1.6.13	2020-08-22	5.1 and up	Philippine Red Cross	This app has access to: Location: precise location (GPS and network-based) approximate location (network-based) Other: receive data from Internet access Bluetooth settings pair with Bluetooth devices view network connections full network access prevent device from sleeping run at startup	RC143	Philippines
2020-09-25 11:00:33	2020-09-25	100000	4	2042	1.2.3	2020-09-14	5.0 and up	Multisys Technologies Corporation	This app has access to: Location: approximate location (network-based) precise location (GPS and network-based) Phone: read phone status and identity Photos / Media / Files: read the contents of your USB storage modify or delete the contents of your USB storage Storage: read the contents of your USB storage modify or delete the contents of your USB storage Camera: take pictures and videos Wi-Fi c…	StaySafe PH	Philippines
2020-09-25 11:07:52	2020-09-25	500000	2.3	2661	4.4.0	2020-09-20	5.0 and up	Ministerstwo Cyfryzacji	This app has access to: Other: receive data from Internet pair with Bluetooth devices run at startup view network connections full network access prevent device from sleeping	STOP COVID - ProteGO Safe	Poland
2020-09-25 11:12:32	2020-09-25	500000	3.8	2252	1.0.3	2020-09-21	6.0 and up	FCT FCCN	This app has access to: Other: view network connections pair with Bluetooth devices full network access run at startup prevent device from sleeping	STAYAWAY COVID	Portugal
2020-09-25 11:18:01	2020-09-25	1000000	4	27397	9.0.2	2020-08-10	6.0 and up	Ministry Of Interior - Qatar	This app has access to: Location: approximate location (network-based) precise location (GPS and network-based) Phone: directly call phone numbers read phone status and identity Photos / Media / Files: read the contents of your USB storage modify or delete the contents of your USB storage Storage: read the contents of your USB storage modify or delete the contents of your USB storage Device ID & …	EHTERAZ	Qatar
2020-09-25 11:25:40	2020-09-25	1000000	4.3	5568	1.2.0	2020-08-28	6.0 and up	National Information Center	This app has access to: Other: receive data from Internet view network connections pair with Bluetooth devices full network access run at startup prevent device from sleeping	Tabaud (COVID-19 KSA)	Saudi Arabia
2020-09-25 11:29:40	2020-09-25	10000	3.3	93	2.2.4.1728	2020-06-03	5.1 and up	SWIFT Office	This app has access to: Calendar: read calendar events plus confidential information add or modify calendar events and send email to guests without owners' knowledge Location: approximate location (network-based) precise location (GPS and network-based) Camera: take pictures and videos Microphone: record audio Wi-Fi connection information: view Wi-Fi connections Other: receive data from Internet …	SwiftMED	Singapore
2020-09-25 11:35:00	2020-09-25	1000000	4.1	8222	2.3.7	2020-09-24	5.1 and up	Government Technology Agency	This app has access to: Camera: take pictures and videos Location: precise location (GPS and network-based) approximate location (network-based) Storage: read the contents of your USB storage modify or delete the contents of your USB storage Photos / Media / Files: read the contents of your USB storage modify or delete the contents of your USB storage Other: receive data from Internet pair with B…	TraceTogether	Singapore
2020-09-25 11:39:46	2020-09-25	100000	3.5	121	0.11.0	2020-06-16	5.0 and up	Government Technology Agency	This app has access to: Calendar: read calendar events plus confidential information add or modify calendar events and send email to guests without owners' knowledge Contacts: read your contacts Location: approximate location (network-based) precise location (GPS and network-based) Phone: read phone status and identity Photos / Media / Files: read the contents of your USB storage modify or delete…	SafeEntry (Business)	Singapore
2020-09-25 11:44:27	2020-09-25	500	3.2	5	1	2020-06-05	5.0 and up	CSIR	This app has access to: Location: precise location (GPS and network-based) approximate location (network-based) Storage: modify or delete the contents of your USB storage read the contents of your USB storage Camera: take pictures and videos Photos / Media / Files: modify or delete the contents of your USB storage read the contents of your USB storage Other: receive data from Internet full networ…	Covi-ID	South Africa
2020-09-25 11:48:04	2020-09-25	50000	3.1	640	4.1	2020-09-04	5.0 and up	Osakidetza	This app has access to: Contacts: read your contacts Photos / Media / Files: read the contents of your USB storage modify or delete the contents of your USB storage Storage: read the contents of your USB storage modify or delete the contents of your USB storage Camera: take pictures and videos Other: receive data from Internet view network connections full network access run at startup prevent de…	COVID-19.eus	Spain
2020-09-25 11:51:08	2020-09-25	1000000	3.4	7951	1.0.6	2020-09-15	6.0 and up	Ministerio de Asuntos Económicos y Transf. Digital	This app has access to: Other: view network connections pair with Bluetooth devices full network access run at startup prevent device from sleeping	Radar COVID	Spain
2020-09-25 11:54:08	2020-09-25	500000	3.6	3163	1.0.9	2020-08-28	6.0 and up	Federal Office of Public Health FOPH	This app has access to: Other: view network connections pair with Bluetooth devices full network access run at startup prevent device from sleeping	SwissCovid	Switzerland
2020-09-25 13:03:43	2020-09-25	500	3.2	30	0.0.51	2020-05-10	5.0 and up	Health Tech Cluster Switzerland	This app has access to: Camera: take pictures and videos Microphone: record audio Location: precise location (GPS and network-based) approximate location (network-based) Storage: read the contents of your USB storage modify or delete the contents of your USB storage Calendar: add or modify calendar events and send email to guests without owners' knowledge read calendar events plus confidential in…	geoHealthApp Covid19 / Coronavirus​ Tracker	Switzerland
2020-09-25 13:09:59	2020-09-25	100000	4	839	1.8.4	2020-06-06	5.0 and up	Digital Government Development Agency, Thailand	This app has access to: Device & app history: retrieve running apps Location: approximate location (network-based) precise location (GPS and network-based) access extra location provider commands Photos/Media/Files: read the contents of your USB storage modify or delete the contents of your USB storage Storage: read the contents of your USB storage modify or delete the contents of your USB storag…	MorChana	Thailand
2020-09-25 13:14:13	2020-09-25	50000	4	250	1.1	2020-05-22	5.0 and up	ONMNE Tunisie	This app has access to: Location: precise location (GPS and network-based) Other: receive data from Internet pair with Bluetooth devices access Bluetooth settings full network access run at startup	E7mi	Tunisia
2020-09-25 13:21:54	2020-09-25	10000000	2.8	87747	2.2.0	2020-09-18	5.0 and up	T.C. Sağlık Bakanlığı	This app has access to: Contacts: read your contacts Location: approximate location (network-based) precise location (GPS and network-based) Photos/Media/Files: read the contents of your USB storage modify or delete the contents of your USB storage Storage: read the contents of your USB storage modify or delete the contents of your USB storage Camera: take pictures and videos Microphone: record a…	Hayat Eve Sığar	Turkey
2020-09-25 13:25:15	2020-09-25	100000	3	340	1.1.6	2020-04-13	5.1 and up	Department of Health - Abu Dhabi	This app has access to: Location: approximate location (network-based) precise location (GPS and network-based) Photos/Media/Files: read the contents of your USB storage Storage: read the contents of your USB storage Other: receive data from Internet view network connections pair with Bluetooth devices access Bluetooth settings full network access run at startup prevent device from sleeping	TraceCovid	UAE
2020-09-25 13:28:35	2020-09-25	1000000	3.7	3031	1.42.5	2020-08-07	5.0 and up	MOHAP-UAE	This app has access to: Location: approximate location (network-based) precise location (GPS and network-based) Photos / Media / Files: read the contents of your USB storage modify or delete the contents of your USB storage Storage: read the contents of your USB storage modify or delete the contents of your USB storage Camera: take pictures and videos Other: receive data from Internet view networ…	ALHOSN UAE	UAE
2020-09-25 13:31:30	2020-09-25	100000	3.4	319	1.0.1.42	2020-08-19	6.0 and up	Health & Social Care Northern Ireland	This app has access to: Wi-Fi connection information: view Wi-Fi connections Other: run at startup full network access view network connections pair with Bluetooth devices control vibration	StopCOVID NI	United Kingdom
2020-09-25 13:37:54	2020-09-25	100000	4.2	3616	4.3.9	2020-07-01	5.0 and up	AGESIC	This app has access to: Microphone: record audio Camera: take pictures and videos Other: receive data from Internet pair with Bluetooth devices view network connections full network access change network connectivity control vibration prevent device from sleeping run at startup	Coronavirus UY	Uruguay
2020-09-25 13:41:04	2020-09-25	10000	3.7	408	1.3.56	2020-09-18	7.0 and up	Twenty Inc.	This app has access to: Contacts: read your contacts Camera: take pictures and videos Location: precise location (GPS and network-based) Wi-Fi connection information: view Wi-Fi connections Other: receive data from Internet access Bluetooth settings prevent device from sleeping pair with Bluetooth devices run at startup full network access view network connections control vibration	Healthy Together - COVID-19	USA-Utah
2020-09-25 14:07:33	2020-09-25	10000	4.3	174	3.3.1	2020-08-17	6.0 and up	Expii, Inc.	This app has access to: Location: precise location (GPS and network-based) approximate location (network-based) Wi-Fi connection information: view Wi-Fi connections Microphone: record audio Other: receive data from Internet access Bluetooth settings prevent device from sleeping connect and disconnect from Wi-Fi pair with Bluetooth devices run at startup full network access change your audio setti…	NOVID	USA-Allegheny County, Pennsylvania
2020-09-25 14:12:04	2020-09-25	50000	3	252	3.1	2020-06-26	6.0 and up	ProudCrowd, LLC	This app has access to: Location: approximate location (network-based) precise location (GPS and network-based) Other: receive data from Internet run at startup view network connections full network access prevent device from sleeping	Care19 Diary	USA-North Dakota, South Dakota, Wyoming
2020-09-25 14:15:34	2020-09-25	1000	3.9	35	1.0.5	2020-08-28	5.1 and up	Palm Beach County BoCC	This app has access to: Location: precise location (GPS and network-based) Other: receive data from Internet access Bluetooth settings full network access prevent device from sleeping view network connections pair with Bluetooth devices	CombatCOVID PBC	USA-Palm Beach County
2020-09-25 14:19:07	2020-09-25	5000	3	61	2.5.8	2020-09-11	6.0 and up	University of Illinois	This app has access to: Location: approximate location (network-based) precise location (GPS and network-based) Photos / Media / Files: read the contents of your USB storage modify or delete the contents of your USB storage Storage: read the contents of your USB storage modify or delete the contents of your USB storage Camera: take pictures and videos Wi-Fi connection information: view Wi-Fi conn…	Safer Illinois	USA-Illinois
2020-09-25 14:24:55	2020-09-25	10000	3.2	164	0.5.19	2020-04-16	5.0 and up	MIT	This app has access to: Location: precise location (GPS and network-based) access extra location provider commands approximate location (network-based) Wi-Fi connection information: view Wi-Fi connections Device & app history: retrieve running apps Photos/Media/Files: read the contents of your USB storage modify or delete the contents of your USB storage Storage: read the contents of your USB sto…	Private Kit	USA
2020-09-25 14:27:58	2020-09-23	10000	4	59	v1.3	2020-09-11	7.0 and up	Alabama Department of Public Health	This app has access to: Other: view network connections pair with Bluetooth devices full network access run at startup prevent device from sleeping	GuideSafe	USA-Alabama
2020-09-25 14:31:20	2020-09-25	1000	4.3	22	1.0.25	2020-09-03	6.0 and up	ADHS-Arizona Department of Health Services	This app has access to: Other: pair with Bluetooth devices view network connections run at startup full network access prevent device from sleeping	Covid Watch Arizona	USA-Arizona
2020-09-25 14:34:13	2020-09-25	5000	3.5	56	1.2.10	2020-09-17	7.0 and up	Nevada Division of Public and Behavioral Health	This app has access to: Device & app history: retrieve running apps Other: view network connections pair with Bluetooth devices full network access run at startup prevent device from sleeping	Covid Trace Nevada	USA-Nevada
2020-09-25 14:37:15	2020-09-25	10000	4.3	600	1	2020-08-28	6.0 and up	VDH	This app has access to: Other: view network connections pair with Bluetooth devices full network access run at startup prevent device from sleeping	COVIDWISE	USA-Virginia
2020-09-25 14:43:58	2020-09-25	10000	4.1	68	1.3.1 (2)	2020-08-05	5.0 and up	Path Check, Inc	This app has access to: Storage: modify or delete the contents of your USB storage read the contents of your USB storage Photos/Media/Files: modify or delete the contents of your USB storage read the contents of your USB storage Wi-Fi connection information: view Wi-Fi connections Device & app history: retrieve running apps Location: precise location (GPS and network-based) access extra location …	PathCheck SafePlaces	USA-Haiti, Guam, Puerto Rico, and Teton County, Wyoming
2020-09-25 14:49:28	2020-09-25	1000000	4.4	41692	0.1007.0	2020-09-25	5.0 and up	Sp0n Inc.	This app has access to: Photos / Media / Files: read the contents of your USB storage modify or delete the contents of your USB storage Wi-Fi connection information: view Wi-Fi connections Camera: take pictures and videos Microphone: record audio Storage: read the contents of your USB storage modify or delete the contents of your USB storage Contacts: read your contacts Location: approximate loca…	Citizen: Connect on the Most Powerful Safety App	USA-San Joaquin County, CA
2020-09-25 14:52:38	2020-09-25	1000	4.3	18	2.0.1	2020-06-17	6.0 and up	Nodle	This app has access to: Location: approximate location (network-based) precise location (GPS and network-based) Other: receive data from Internet view network connections pair with Bluetooth devices access Bluetooth settings full network access run at startup prevent device from sleeping	Coalition App | #StopCovid19	USA
2020-09-25 14:55:42	2020-09-25	10000000	4.5	92233	3.0.3	2020-09-18	6.0 and up	Cục Tin học hóa, Bộ Thông tin và Truyền thông	This app has access to: Location: precise location (GPS and network-based) approximate location (network-based) Photos/Media/Files: read the contents of your USB storage modify or delete the contents of your USB storage Storage: read the contents of your USB storage modify or delete the contents of your USB storage Wi-Fi connection information: view Wi-Fi connections Other: receive data from Inte…	Bluezone - Contact detection	Vietnam
2020-09-25 21:20:51	2020-09-25	10000000	4.5	92233	3.0.3	2020-09-18	6.0 and up	Cục Tin học hóa, Bộ Thông tin và Truyền thông	This app has access to: Location: precise location (GPS and network-based) approximate location (network-based) Photos/Media/Files: read the contents of your USB storage modify or delete the contents of your USB storage Storage: read the contents of your USB storage modify or delete the contents of your USB storage Wi-Fi connection information: view Wi-Fi connections Other: receive data from Inte…	Bluezone - Contact detection	Vietnam
2020-11-06 10:02:06	2020-11-06	100000	2.8	741	1.0.3	2020-03-23	N/A	N/A	N/A	Coronavirus Algérie	N/A
2020-11-06 22:35:02	2020-11-06	1000000	2.8	13564	1.13.0	2020-10-12	N/A	N/A	N/A	COVIDSafe	Australia
2020-11-06 22:40:46	2020-11-06	100000	3.2	3162	2.0.5.1081-QA_250	2020-10-09	N/A	N/A	N/A	Stopp Corona	Austria
2020-11-06 22:44:14	2020-11-06	100000	3.6	2174	1.7.7	2020-09-25	N/A	N/A	N/A	e-Tabib	Azerbaijan
2020-11-06 22:47:27	2020-11-06	100000	4.4	4232	0.2.6	2020-11-05	N/A	N/A	N/A	BeAware Bahrain	Bahrain
2020-11-06 22:50:09	2020-11-06	500000	3.4	4329	1.0.14	2020-07-21	N/A	N/A	N/A	Corona Tracer BD	Bangladesh
2020-11-06 22:51:24	2020-11-06	100000	4.1	1240	2	2020-07-21	N/A	N/A	N/A	Druk Trace	Bhutan
2020-11-07 10:11:49	2020-11-07	5000000	3.5	19940	2.1.8	2020-10-27	N/A	N/A	N/A	Coronavírus - SUS	Brazil
2020-11-07 10:15:34	2020-11-07	100000	3.6	1984	2.7.2	2020-09-17	N/A	N/A	N/A	Dycovid - Dynamic Contact Tracing	Brazil
2020-11-07 10:18:16	2020-11-07	10000	3.3	1042	1.0.3	2020-05-27	N/A	N/A	N/A	ViruSafe	Bulgaria
2020-11-07 10:20:56	2020-11-07	100000	2.6	670	1.4.0	2020-09-28	N/A	N/A	N/A	ABTraceTogether	Canada
2020-11-07 10:25:17	2020-11-07	1000000	3.6	6056	1.0.14	2020-10-29	N/A	N/A	N/A	COVID Alert	Canada
2020-11-07 10:29:46	2020-11-07	10000000	3.8	66756	1.2.57	2020-10-03	N/A	N/A	N/A	CoronApp - Colombia	Colombia
2020-11-07 11:05:48	2020-11-07	10000	3.9	461	1.1.0	2020-09-11	N/A	N/A	N/A	Stop COVID-19	Croatia
2020-11-07 11:09:08	2020-11-07	1000	4.2	14	2.0.2	2020-06-11	N/A	N/A	N/A	CovTracer	Cyprus
2020-11-07 11:15:21	2020-11-07	1000000	3.7	6373	2.1.613	2020-10-18	N/A	N/A	N/A	eRouška - Part of Smart Quarantine	Czech Republic
2020-11-07 11:33:34	2020-11-07	500000	2.4	1320	1.2	2020-10-22	N/A	N/A	N/A	Smittestop	Denmark
2020-11-07 11:38:04	2020-11-07	100000	3.5	479	1.0.5	2020-11-03	N/A	N/A	N/A	Hoia	Estonia
2020-11-07 11:41:39	2020-11-07	50000	3.6	224	1.0.47	2020-09-12	N/A	N/A	N/A	careFIJI	Fiji
2020-11-07 11:44:43	2020-11-07	1000000	3.2	4358	1.2.1+85fac83	2020-10-27	N/A	N/A	N/A	Koronavilkku	Finland
2020-11-08 13:00:00	2020-11-08	1000000	3.3	24609	2.1.1	2020-11-04	N/A	N/A	N/A	TousAntiCovid	France
2020-11-08 13:02:23	2020-11-08	100000	3.9	695	1.0.467	2020-04-17	N/A	N/A	N/A	Stop Covid - let's fight this together	Georgia
2020-11-08 13:04:38	2020-11-08	10000000	3	90824	1.5.1	2020-10-26	N/A	N/A	N/A	Corona-Warn-App	Germany
2020-11-08 13:06:58	2020-11-08	5000	3.7	29	1.0.5	2020-07-27	N/A	N/A	N/A	GH COVID-19 Tracker	Ghana
2020-11-08 13:09:45	2020-11-08	10000	3.2	68	1.0.1.18	2020-06-25	N/A	N/A	N/A	Beat Covid Gibraltar	Gibraltar
2020-11-08 13:12:04	2020-11-08	100000	3.1	419	1.0.0	2020-05-15	N/A	N/A	N/A	VírusRadar	Hungary
2020-11-08 13:13:34	2020-11-08	100000	3	376	2.1.2	2020-07-19	N/A	N/A	N/A	Rakning C-19	Iceland
2020-11-08 13:16:06	2020-11-08	100000000	4.1	1406206	1.4.1	2020-07-08	N/A	N/A	N/A	Aarogya Setu	India
2020-11-08 13:18:36	2020-11-08	500000	2.3	2111	1.07	2020-06-29	N/A	N/A	N/A	Corona Watch	India
2020-11-08 13:21:07	2020-11-08	1000000	3.9	32081	1.3.23	2020-10-28	N/A	N/A	N/A	COVA Punjab	India
2020-11-08 13:23:20	2020-11-08	100000	2.7	217	1.7.1	2020-05-08	N/A	N/A	N/A	Mahakavach	India
2020-11-08 13:25:01	2020-11-08	100000	3.1	343	1.2.6	2020-09-02	N/A	N/A	N/A	SMC COVID-19 Tracker	India
2020-11-08 13:26:05	2020-11-08	1000000	3.9	38845	2.3.0	2020-07-21	N/A	N/A	N/A	PeduliLindungi	Indonesia
2020-11-08 13:28:13	2020-11-08	500000	4	3444	1.0.4	2020-10-27	N/A	N/A	N/A	COVID Tracker Ireland	Ireland
2020-11-08 13:30:25	2020-11-08	1000000	3.2	5039	2.2.14	2020-08-27	N/A	N/A	N/A	HaMagen	Israel
2020-11-08 13:32:25	2020-11-08	5000000	2.9	40097	2.1.1	2020-11-03	N/A	N/A	N/A	Immuni	Italy
2020-11-08 14:19:16	2020-11-08	50000	4.7	838	5.1	2020-07-17	N/A	N/A	N/A	SM_Covid19	Italy
2020-11-08 21:50:24	2020-11-08	5000000	3	10949	1.1.5	2020-10-30	N/A	N/A	N/A	COCOA - COVID-19 Contact App	Japan
2020-11-08 21:54:12	2020-11-08	1000000	3.2	6237	1	2020-05-24	N/A	N/A	N/A	AMAN - Aman.jo JORDAN APP COVID-19	Jordan
2020-11-08 21:58:55	2020-11-08	1000	2.2	19	v0.4.38	2020-04-28	N/A	N/A	N/A	Kenya Covid-19 Tracker	Kenya
2020-11-08 22:03:50	2020-11-08	100000	3.5	1023	1.1	2020-10-27	N/A	N/A	N/A	Apturi Covid Latvia – SPKC	Latvia
2020-11-08 22:05:36	2020-11-08	10000	3.2	87	1.0.4	2020-10-08	N/A	N/A	N/A	Ma3an - Together Against Corona	Lebanon
2020-11-08 22:08:30	2020-11-08	50000	3.1	139	2.1.0	2020-09-17	N/A	N/A	N/A	COVIDTrace	Malaysia
2020-11-09 17:31:43	2020-11-09	1000000	3.6	7403	2.6.73	2020-05-22	N/A	N/A	N/A	GERAK MALAYSIA	Malaysia
2020-11-09 17:33:30	2020-11-09	100000	4	929	1.0.30	2020-04-26	N/A	N/A	N/A	MyTrace	Malaysia
2020-11-09 17:37:08	2020-11-09	10000	4.4	111	1.0.2	2020-04-28	N/A	N/A	N/A	TraceEkee	Maldives
2020-11-09 17:39:04	2020-11-09	50000	4.5	129	1.2.8	2020-09-03	N/A	N/A	N/A	COVID Alert Malta	Malta
2020-11-09 17:42:34	2020-11-09	50000	3.3	248	1.1.2	2020-04-08	N/A	N/A	N/A	COVID Radar	Mexico
2020-11-09 17:48:03	2020-11-09	5000	2.7	33	1.6	2020-04-29	N/A	N/A	N/A	Plan Jalisco Covid-19	Mexico
2020-11-09 17:50:56	2020-11-09	1000000	4.2	13046	1.2.1	2020-08-12	N/A	N/A	N/A	wiqaytna	Morocco
2020-11-09 17:54:23	2020-11-09	500	3	7	3.0.3	2020-05-24	N/A	N/A	N/A	Nepal Trace	Nepal
2020-11-09 20:32:46	2020-11-09	1000000	3	5741	1.0.4	2020-10-26	N/A	N/A	N/A	CoronaMelder	Netherlands
2020-11-09 20:35:19	2020-11-09	1000000	2.7	4205	1.5.1	2020-10-05	N/A	N/A	N/A	NZ COVID Tracer	New Zealand
2020-11-09 20:37:26	2020-11-09	50000	3.3	307	1.1.0	2020-05-07	N/A	N/A	N/A	StopKorona!	North Macedonia
2020-11-09 21:41:46	2020-11-09	100000	2.2	2149	1.3.0	2020-06-08	N/A	N/A	N/A	Smittestopp	Norway
2020-11-09 21:43:36	2020-11-09	10000	2.5	106	1.1.4	2020-09-26	N/A	N/A	N/A	HMushrif	Oman
2020-11-09 21:47:04	2020-11-09	100000	3.5	750	1.6.13	2020-08-22	N/A	N/A	N/A	RC143	Phillippines
2020-11-09 21:49:15	2020-11-09	100000	4.1	2338	1.3.1	2020-09-28	N/A	N/A	N/A	StaySafe PH	Phillippines
2020-11-09 21:52:34	2020-11-09	1000000	2.1	4410	4.7.0	2020-10-29	N/A	N/A	N/A	STOP COVID - ProteGO Safe	Poland
2020-11-09 21:56:09	2020-11-09	1000000	3.2	5616	1.0.5	2020-10-12	N/A	N/A	N/A	STAYAWAY COVID	Portugal
2020-11-09 22:02:31	2020-11-09	1000000	4	28545	9.0.2	2020-08-10	N/A	N/A	N/A	EHTERAZ	Qatar
2020-11-10 23:41:41	2020-11-11	1000000	4.3	6890	1.2.0	2020-08-28	N/A	N/A	N/A	Tabaud (COVID-19 KSA)	Saudi Arabia
2020-11-10 23:44:35	2020-11-11	100000	3.6	168	0.11.0	2020-06-16	N/A	N/A	N/A	SafeEntry (Business)	Singapore
2020-11-10 23:47:21	2020-11-11	10000	3.3	93	2.2.4.1728	2020-06-03	N/A	N/A	N/A	SwiftMED	Singapore
2020-11-11 13:25:54	2020-11-11	1000000	3.8	10463	2.4.1	2020-11-01	N/A	N/A	N/A	TraceTogether	Singapore
2020-11-11 13:28:57	2020-11-11	500	3.2	5	1	2020-06-05	N/A	N/A	N/A	Covi-ID	South Africa
2020-11-11 13:29:51	2020-11-11	100000	3.2	664	4.1	2020-09-04	N/A	N/A	N/A	COVID-19.eus	Spain
2020-11-11 13:31:54	2020-11-11	1000000	3.5	12012	1.1.0	2020-10-29	N/A	N/A	N/A	Radar COVID	Spain
2020-11-11 13:34:06	2020-11-11	1000	3.3	31	0.0.52	2020-10-02	N/A	N/A	N/A	geoHealthApp Covid19 / Coronavirus​ Tracker	Switzerland
2020-11-11 13:36:17	2020-11-11	500000	3.1	3591	1.2.0	2020-10-28	N/A	N/A	N/A	SwissCovid	Switzerland
2020-11-11 20:56:22	2020-11-11	100000	4	876	1.8.4	2020-06-06	N/A	N/A	N/A	MorChana - หมอชนะ	Thailand
2020-11-11 21:02:56	2020-11-11	50000	3.9	267	1.1	2020-05-22	N/A	N/A	N/A	E7mi	Tunisia
2020-11-11 21:05:06	2020-11-11	10000000	3.2	96433	2.2.1	2020-10-25	N/A	N/A	N/A	Hayat Eve Sığar	Turkey
2020-11-11 21:10:07	2020-11-11	1000000	4.5	5645	1.44.248	2020-11-10	N/A	N/A	N/A	ALHOSN UAE	UAE
2020-11-11 21:18:25	2020-11-11	100000	2.6	458	2.0.2	2020-10-07	N/A	N/A	N/A	StopCOVID NI	United Kingdom
2020-11-12 15:35:53	2020-11-12	500000	4.1	3963	4.5.3	2020-10-15	N/A	N/A	N/A	Coronavirus UY	Urugway
2020-11-12 15:39:41	2020-11-12	50000	3.2	262	3.1	2020-06-26	N/A	N/A	N/A	Care19 Diary	USA
2020-11-12 15:42:18	2020-11-12	1000000	4.4	43799	0.1014.1	2020-11-11	N/A	N/A	N/A	Citizen: Connect on the Most Powerful Safety App	USA
2020-11-12 15:44:37	2020-11-12	1000	4.2	20	2.0.1	2020-06-17	N/A	N/A	N/A	Coalition App | #StopCovid19	USAA
2020-11-12 15:45:30	2020-11-12	1000	3.8	38	1.0.5	2020-08-28	N/A	N/A	N/A	CombatCOVID PBC	USA
2020-11-12 15:48:12	2020-11-12	10000	3.3	135	1.2.11	2020-10-02	N/A	N/A	N/A	Covid Trace Nevada	USA
2020-11-12 15:50:12	2020-11-12	5000	4	29	1.0.30	2020-09-28	N/A	N/A	N/A	Covid Watch Arizona	USA
2020-11-12 15:52:28	2020-11-12	100000	3.9	908	1	2020-08-28	N/A	N/A	N/A	COVIDWISE	USA
2020-11-12 16:15:53	2020-11-12	50000	3.5	152	v1.3	2020-09-11	N/A	N/A	N/A	GuideSafe	USA
2020-11-12 16:17:51	2020-11-12	10000	3.7	447	1.3.79	2020-10-23	N/A	N/A	N/A	Healthy Together - COVID-19	USA
2020-11-12 16:20:04	2020-11-12	10000	4.3	195	4.1.0	2020-11-11	N/A	N/A	N/A	NOVID	USA
2020-11-12 16:22:26	2020-11-12	10000	4.1	71	1.3.1 (2)	2020-08-05	N/A	N/A	N/A	PathCheck SafePlaces	USA
2020-11-12 16:29:23	2020-11-12	10000	3	164	0.5.19	2020-04-16	N/A	N/A	N/A	Private Kit	USA
2020-11-12 16:31:24	2020-11-12	10000	3.2	72	2.7.4	2020-10-08	N/A	N/A	N/A	Safer Illinois	USA
2020-11-12 16:34:53	2020-11-12	10000000	4.5	96959	3.0.6	2020-10-28	N/A	N/A	N/A	Bluezone - Contact detection	Vietnam
